# Supplementary material for: Characterisation of cell-scale signalling by the core planar polarity pathway during Drosophila wing development
Source: eLife. 2025 Dec 5;14:RP107947. doi: 10.7554/eLife.107947 (PMC12680375; doi:10.7554/eLife.107947)
Supplement: Figure 1—figure supplement 1—source data 3. [file elife-107947-fig1-figsupp1-data3.xlsx]

## Sheet: 130225
		Fz	Actin	Fz/Actin		Normalised		Mean	SD
wt	A	14923	1227.23	12.1599		1		1	0
FT 6hr	A	952.941	2328.43	0.409264		0.033657		0.141674	0.0906014
FT 8hr	A	859.527	1108.53	0.775378		0.0637653		0.230589	0.151899
FT 10hr	A							0.38335	0.328852
FT	A	1395.77	4860.91	0.287142		0.0236139		0.137094	0.172176
								Excluding samples A
wt	B	8325	2238.84	3.71844		1		1	0
FT 6hr	B	1398.01	2820.96	0.49558		0.133276		0.17768	0.0673382
FT 8hr	B	4064.5	3150.38	1.29016		0.346963		0.286197	0.126714
FT 10hr	B	4004.2	1413.06	2.83371		0.762068		0.38335	0.328852
FT	B	2063.3	1413.65	1.45956		0.392519		0.17492	0.189424
wt	C	9066.59	1767.06	5.13088		1
FT 6hr	C	1163.94	1568.77	0.741945		0.144604
FT 8hr	C	3151.26	4369.96	0.721117		0.140544
FT 10hr	C	1448.77	1660.48	0.872502		0.170049
FT	C	1005.53	4179.08	0.240609		0.0468944
wt	D	12037.5	5024.62	2.3957		1
FT 6hr	D	1706.18	2791.13	0.611287		0.25516
FT 8hr	D	1435.65	1614.89	0.889006		0.371084
FT 10hr	D	688.991	1319.65	0.522102		0.217933
FT	D	1520.48	3472.13	0.437909		0.0853476

## Sheet: 040225
		Fz	Actin	Fz/Actin		Normalised		Mean	SD
wt	A	10184.1	978.991	10.4026		1		1	0
FT 6hr	A	792.527	1175.82	0.674021		0.0647933		0.369902	0.205089
FT 8hr	A	1079.06	329.506	3.27479		0.314804		0.652032	0.511322
FT 10hr	A		3864.08					0.80245	0.540374
FT	A	4132.62	5177.86	0.798132		0.0767242		0.504691	0.754831
								Excluding samples A
wt	B	7942.18	2669.55	2.9751		1		1	0
FT 6hr	B	2193.13	1462.77	1.4993		0.50395		0.471605	0.0321153
FT 8hr	B	7520.86	1839.77	4.08794		1.37405		0.764441	0.562459
FT 10hr	B	4264.2	1013.82	4.20608		1.41376		0.80245	0.540374
FT	B	4002.2	822.991	4.863		1.63457		0.647347	0.855892
wt	C	5775.35	739.991	7.80462		1
FT 6hr	C	1813.6	528.456	3.43188		0.439724
FT 8hr	C	3210.67	1548.77	2.07304		0.265618
FT 10hr	C	2992.96	987.113	3.03204		0.388493
FT	C	1407.48	1585.48	0.887731		0.113744
wt	D	13181	4944.03	2.66605		1
FT 6hr	D	1758.6	1400.06	1.25609		0.471142
FT 8hr	D	1633.6	937.406	1.74268		0.653657
FT 10hr	D	1015.65	629.577	1.61322		0.605099
FT	D	1509.48	2922.55	0.516493		0.19373
