# Supplementary material for: Characterisation of cell-scale signalling by the core planar polarity pathway during Drosophila wing development
Source: eLife. 2025 Dec 5;14:RP107947. doi: 10.7554/eLife.107947 (PMC12680375; doi:10.7554/eLife.107947)
Supplement: Figure 3—figure supplement 1—source data 3. [file elife-107947-fig3-figsupp1-data3.xlsx]

## Sheet: Sheet1
Pk		Pk	Actin	Pk/Actin	Mean		Normalised	Mean	SD	P wrt wt
wt	A	6132.93	4975.08	1.23273			0.681065
wt	B	6515.47	2920.26	2.23113			1.23267
wt	C	7631.59	4954.86	1.54022			0.85095
wt	D	6931.3	3099.96	2.23593	1.81		1.23532	1	0.278953
pk-sple13/+	A	2546.91	3203.13	0.795131			0.439298
pk-sple13/+	B	5411.93	3826.2	1.41444			0.781457
pk-sple13/+	C	1586.67	3879.5	0.408988			0.22596
pk-sple13/+	D	2165.74	4257.08	0.508738	0.781824		0.28107	0.431946	0.249937	0.0229998
