# Supplementary material for: Characterisation of cell-scale signalling by the core planar polarity pathway during Drosophila wing development
Source: eLife. 2025 Dec 5;14:RP107947. doi: 10.7554/eLife.107947 (PMC12680375; doi:10.7554/eLife.107947)
Supplement: Figure 3—figure supplement 1—source data 4. [file elife-107947-fig3-figsupp1-data4.xlsx]

## Sheet: Sheet1
Fmi 160125		GFP	Actin	Fmi/Actin	Mean		Normalised	Mean	SD	P wrt wt
wt	A	5717.57	5230.79	1.09306			0.9457
wt	B	3166.33	3211.55	0.985919			0.853003
wt	C	5349.05	3417.08	1.56539			1.35435
wt	D	2537.2	2591.84	0.97892	1.15582		0.846948	1	0.240517
fmiE59/+	A	2586.08	3059.67	0.845217			0.731269
fmiE59/+	B	1609.96	3168.67	0.508088			0.43959
fmiE59/+	C	1580.43	3135.79	0.503996			0.43605
fmiE59/+	D	3692.74	3819.5	0.966813	0.706028		0.836473	0.610846	0.204362	0.0487203
