# Supplementary material for: Characterisation of cell-scale signalling by the core planar polarity pathway during Drosophila wing development
Source: eLife. 2025 Dec 5;14:RP107947. doi: 10.7554/eLife.107947 (PMC12680375; doi:10.7554/eLife.107947)
Supplement: Figure 3—figure supplement 1—source data 5. [file elife-107947-fig3-figsupp1-data5.xlsx]

## Sheet: Sheet1
		GFP	Actin	GFP/Actin	Mean		Normalised	Mean	SD	P wrt wt
EGFP-dgo	A	4269.45	4194.08	1.01797			0.796804
EGFP-dgo	B	2558.26	3472.38	0.736745			0.576679
EGFP-dgo	C	4705.45	3464.38	1.35824			1.06315
EGFP-dgo	D	5804.69	2906.26	1.99731	1.27757		1.56337	1	0.424996
EGFP-dgo/dgo380	A	2746.26	4965.62	0.553054			0.432897
EGFP-dgo/dgo380	B	164.607	3223.08	0.0510713			0.0399755
EGFP-dgo/dgo380	C	1381.84	3103.67	0.445228			0.348497
EGFP-dgo/dgo380	D	988.527	2689.13	0.3676	0.354238		0.287735	0.277276	0.169028	0.0195573
