# Supplementary material for: Characterisation of cell-scale signalling by the core planar polarity pathway during Drosophila wing development
Source: eLife. 2025 Dec 5;14:RP107947. doi: 10.7554/eLife.107947 (PMC12680375; doi:10.7554/eLife.107947)
Supplement: Figure 3—figure supplement 2—source data 2. [file elife-107947-fig3-figsupp2-data2.xlsx]

## Sheet: Feuil1
Fig.3_S2I Fraction of stable Fz in de novo condition - 8h
control	dgo/+	pk/+	dsh/+	stbm/+	fmi/+
0.982754	0.926586	0.998046	0.964051	0.882678	0.910296
1.15256	0.943589	0.91403	0.978973	0.936315	0.848385
1.07195	0.83946	1.0327	0.837619	0.954554	0.818233
1.04226	0.787105	0.902404	0.800128	0.850074	0.891239
0.949728	0.86358	0.947304	0.785331	0.908209	0.889807
0.89818	0.771592	1.04535	0.881556	0.782379	0.845191
0.959634	0.905482	1.22923	0.861931	0.743691	0.984759
0.886793	0.893818	0.834062	0.744316	0.98687	1.03884
0.900625	0.867007	0.971871			0.878554
		0.94721
