# Supplementary material for: Characterisation of cell-scale signalling by the core planar polarity pathway during Drosophila wing development
Source: eLife. 2025 Dec 5;14:RP107947. doi: 10.7554/eLife.107947 (PMC12680375; doi:10.7554/eLife.107947)
Supplement: Figure 3—source data 2. [file elife-107947-fig3-data2.xlsx]

## Sheet: Feuil1
Fig.3I Fz-mKate2 polarity magnitude in condition
control	dgo/+	pk/+	dsh/+	stbm/+	fmi/+	dsh/dsh
0.32652	0.34974	0.3377	0.30237	0.25474	0.36907	0.17932
0.46045	0.22054	0.3157	0.24776	0.21369	0.30162	0.13339
0.40209	0.32219	0.2392	0.38593	0.17785	0.39119	0.15639
0.32749	0.35848	0.20051	0.32796	0.26861	0.3954	0.14315
0.24374	0.30369	0.29493	0.33259	0.26483	0.34905	0.14537
0.50038	0.26091	0.28805	0.30197	0.22509	0.41359	0.15419
0.49693	0.21455	0.17924	0.23485	0.27856	0.39139	0.14665
0.36305	0.32872	0.28861	0.30179	0.18539	0.38977	0.16215
0.40459		0.22884	0.35922	0.37162	0.48726	0.18066
0.37227		0.24509	0.23354		0.39637
0.37266
