# Supplementary material for: Characterisation of cell-scale signalling by the core planar polarity pathway during Drosophila wing development
Source: eLife. 2025 Dec 5;14:RP107947. doi: 10.7554/eLife.107947 (PMC12680375; doi:10.7554/eLife.107947)
Supplement: Figure 4—figure supplement 1—source data 1. [file elife-107947-fig4-figsupp1-data1.xlsx]

## Sheet: de novo condition
Fig.4_S1A-E De novo condition - Cell, Stbm, Microtubule orientation
	Cell orientation	Cell eccentricity	Stbm orientation angle variance	Stbm polarity magnitude	Microtubule orientation
wild-type	2.6273	0.48421	0.12684	0.1707	31.204
	4.0795	0.52071	0.29612	0.14746	16.749
	1.2768	0.59507	0.22607	0.1646	12.132
	5.7141	0.50087	0.15701	0.19219	-1.562
	-5.9314	0.63244	0.2381	0.15682	-32.692
	1.398	0.64375	0.23444	0.13786	-15.683
	8.9222	0.64129	0.13683	0.18368	10.814
w/o de novo induction	24.454	0.58549	0.76344	0.083929	10.822
	9.0986	0.65307	0.93711	0.078457	-0.57386
	2.3462	0.57663	0.69291	0.10395	11.371
	-17.159	0.52759	0.97936	0.1157	-7.8552
	-32.899	0.52014	0.8354	0.10633	6.6152
	-11.047	0.67232	0.79476	0.10059	-8.9375
	0.0085377	0.61702	0.83523	0.11581	6.3993
	-8.507	0.54112	0.8853	0.11313	0.71084
with de novo induction	9.7969	0.616	0.69631	0.11538	10.556
	2.737	0.72544	0.66951	0.11225	15.913
	3.5116	0.68757	0.85725	0.1186	13.085
	-12.624	0.60252	0.87771	0.093518	-4.2234
	-16.031	0.52376	0.83596	0.10494	-3.3016
	-22.075	0.55475	0.76137	0.11847	-6.6391
	-21.238	0.54647	0.73834	0.10156	4.2837
	-16.599	0.68055	0.51647	0.10533	-11.924
	-17.277	0.57632	0.89262	0.1204	-14.418
