# Supplementary material for: Characterisation of cell-scale signalling by the core planar polarity pathway during Drosophila wing development
Source: eLife. 2025 Dec 5;14:RP107947. doi: 10.7554/eLife.107947 (PMC12680375; doi:10.7554/eLife.107947)
Supplement: Figure 4—figure supplement 1—source data 2. [file elife-107947-fig4-figsupp1-data2.xlsx]

## Sheet: w-o repolarisation induction
Fig.4_S1F-J Repolarisation condition - Cell, Stbm, Microtubule orientation
		Cell orientation	Cell eccentricity	Stbm orientation	Stbm polarity magnitude	Microtubule orientation
w/o repolarisation induction
	row 0	4.3498	0.83714	13.59	0.13948	-4.7036
		11.759	0.72246	5.6209	0.12969	-16.442
		7.1368	0.69322	35.5628	0.18434	-10.738
		-6.8324	0.79347	-23.5412	0.21166	-7.2784
		7.4646	0.83355	-2.5121	0.090636	1.4183
		2.5989	0.83194	-5.4799	0.070055	10.668
		5.6889	0.76056	11.499	0.118	-9.0871
		10.486	0.72188	-4.9094	0.20612	14.18
	row 1	6.9112	0.85984	20.7377	0.11685	2.9415
		18.454	0.79843	34.8079	0.082585	-7.3033
		15.228	0.71287	38.0433	0.25421	-7.2838
		15.228	0.71287	-15.7694	0.18716	-4.1585
		-1.4686	0.84094	11.3887	0.18958	-4.5588
		1.8494	0.83084	-0.20079	0.12526	12.727
		4.6501	0.72065	14.5375	0.19081	-5.9013
		6.9112	0.85984	-3.8252	0.17287	13.205
	row 2	7.1316	0.73691	28.5019	0.085194	4.9349
		14.354	0.74178	26.915	0.09532	-4.8413
		8.2747	0.67892	24.0735	0.10606	0.71661
		-6.4585	0.83835	-13.4813	0.17549	-6.8088
		-1.4568	0.92494	12.1495	0.079812	-2.2067
		1.9057	0.70944	0.40709	0.11145	6.3646
		-2.3585	0.82694	6.0382	0.14519	-3.4273
		5.5384	0.79566	21.593	0.20092	19.759
	row3	7.4395	0.58216	30.5317	0.12216	-6.387
		15.359	0.69361	26.6515	0.094758	-10.713
		21.515	0.68326	46.2699	0.11883	-6.4853
		-6.786	0.87521	-15.2285	0.090508	-7.8664
		-13.766	0.72946	40.6779	0.14515	-10.223
		8.3689	0.85472	25.3608	0.12232	8.9338
		-5.6686	0.79865	18.5049	0.15535	-3.8534
		13.098	0.75609	1.7981	0.18678	18.161

## Sheet: with repolarisation induction
Fig.4_S1F-J Repolarisation condition - Cell, Stbm, Microtubule orientation
		Cell orientation	Cell eccentricity	Stbm orientation	Stbm polarity magnitude	Microtubule orientation
with repolarisation induction
	row 0	-13.067	0.68493	77.5237	0.243471	1.6276
		22.725	0.80795	86.8774	0.175907	10.333
		11.432	0.7851	84.2144	0.135242	0.45568
		13.281	0.76955	36.6208	0.2794	15.021
		16.268	0.77624	51.2826	0.211523	-2.2718
		8.8063	0.86443	73.2006	0.20658	-2.9895
		2.4919	0.84199	83.8276	0.3034	-8.2052
		10.677	0.67339	70.7217	0.210208	-2.1021
	row 1	-30.11	0.66982	65.0035	0.15955	40.132
		12.077	0.73274	85.6525	0.16401	0.097184
		10.022	0.63424	71.012	0.12449	-12.962
		18.901	0.65717	32.6101	0.16508	15.709
		17.318	0.7724	37.7177	0.2282	1.2952
		5.1317	0.82191	69.8558	0.16747	-6.6091
		3.5587	0.80006	66.6398	0.20666	-4.9085
		1.493	0.53568	41.3939	0.17286	6.714
	row 2	-9.262	0.58196	21.0907	0.19216	-13.548
		15.122	0.80577	27.9312	0.14376	1.4561
		-2.1002	0.6547	38.2616	0.15957	3.269
		0.74228	0.58487	37.0614	0.13731	23.722
		19.728	0.63972	43.6731	0.16114	6.9329
		9.03	0.74711	37.647	0.19583	0.9778
		-3.021	0.75638	27.115	0.10342	-3.3919
		20.414	0.52274	44.8225	0.19479	11.579
	row3	-13.871	0.4919	18.0098	0.10837	14.48
		27.351	0.5831	24.9036	0.17311	6.8096
		11.889	0.60932	8.2596	0.12647	16.949
		-15.628	0.58271	23.401	0.16874	-6.0157
		22.073	0.68038	29.7387	0.17759	8.7051
		15.143	0.78357	20.5219	0.18312	19.729
		-15.13	0.61718	22.4829	0.18767	-32.656
		-6.5363	0.71074	18.7443	0.14801	1.2648
