# Supplementary material for: Characterisation of cell-scale signalling by the core planar polarity pathway during Drosophila wing development
Source: eLife. 2025 Dec 5;14:RP107947. doi: 10.7554/eLife.107947 (PMC12680375; doi:10.7554/eLife.107947)
Supplement: Figure 4—source data 1. [file elife-107947-fig4-data1.xlsx]

## Sheet: wild-type
Fig.4D-L De novo condition - Cell, Stbm, Microtubule orientation
	Cell orientation	Stbm orientation	Microtubule orientation
wild-type	-66.87	7.5182	86.671
	12.858	11.0724	-73.21
	-59.882	-29.0522	83.537
	-69.081	-20.9012	87.086
	21.585	32.6719	33.907
	-79.884	20.672	72.249
	12.369	-23.7347	7.8916
	-88.879	17.2698	27.025
	54.104	-12.6956	55.199
	-77.449	9.9811	-72.268
	-78.389	-46.635	61.01
	31.669	-8.767	48.872
	87.337	51.9774	52.981
	47.092	-24.4815	61.86
	26.039	14.1541	59.215
	24.83	0.68342	44.153
	1.18	36.1881	35.066
	28.811	20.4947	57.858
	20.811	-17.1079	64.834
	-57.354	6.9079	46.397
	-57.147	15.4871	49.824
	-83.09	59.5367	52.4
	-66.852	-9.0817	-88.64
	87.857	4.2854	62.638
	-55.708	5.9708	37.677
	-25.831	15.6696	87.311
	8.372	87.9229	33.779
	75.548	-35.12	65.702
	-87.361	30.0516	-73.405
	5.8728	1.2167	37.533
	75.959	12.2148	-89.695
	51.027	4.2678	61.807
	-74.639	-11.3085	80.445
	4.5928	31.0386	-59.31
	-80.465	6.0503	72.85
	31.368	-0.647	52.465
	65.997	22.9204	78.591
	57.976	-9.3738	86.323
	67.319	-5.3771	-23.222
	17.858	32.5286	22.14
	82.409	-18.7889	78.052
	-87.085	0.34602	71.799
	-30.416	60.2938	-34.432
	23.451	12.4535	51.826
	68.279	-41.491	15.801
	-23.914	-18.6754	73.264
	-86.162	6.3111	-78.794
	54.585	-9.2241	43.485
	30.044	30.8632	28.696
	84.482	1.5629	76.246
	-79.655	-24.5962	78.501
	35.113	-12.7959	32.738
	-22.551	-10.4781	62.867
	21.029	13.1687	-81.55
	-78.832	2.769	-69.984
	20.94	-1.8164	64.143
	40.78	22.9252	45.958
	12.217	7.7902	66.079
	66.391	-11.7995	63.423
	-69.507	15.2281	88.321
	47.357	51.284	55.428
	68.711	-63.283	49.147
	24.249	3.6208	25.611
	66.641	-15.1859	-79.901
	56.175	16.5253	52.039
	-70.422	-4.9344	-69.125
	77.74	-9.2147	63.259
	-86.605	-7.7786	77.776
	45.03	-2.4636	30.389
	23.988	-3.1207	70.063
	-74.001	-21.5902	-82.769
	63.716	24.1134	83.86
	64.092	35.3453	-86.978
	37.862	-65.4567	50.554
	69.452	-17.0588	68.093
	53.593	26.8257	70.653
	-47.664	19.44	66.026
	-86.137	24.9541	-74.224
	-43.872	-30.1447	35.679
	21.657	19.6012	35.636
	65.877	-4.936	69.507
	46.215	-42.9837	43.378
	-13.879	-70.9322	58.158
	33.28	83.3708	28.939
	15.482	-8.5021	15.435
	30.025	-12.1879	50.582
	38.262	-4.412	39.632
	23.587	2.9356	40.634
	-10.763	-22.8486	2.9998
	50.41	1.0392	49.203
	-22.326	-10.6802	-31.171
	-12.064	-85.5679	-11.475
	62.082	-13.7771	63.104
	8.8064	-3.4612	41.181
	-1.2489	-4.4951	48.284
	37.809	-8.9635	70.728
	-60.348	-8.5961	79.484
	-31.602	-17.797	-35.249
	-15.881	-3.7339	-45.677
	-88.794	-22.1693	-85.543
	-23.312	-6.9452	-53.718
	-11.621	9.3613	27.244
	38.702	4.694	50.267
	-14.52	-20.4454	88.2
	37.632	-5.8947	44.501
	-30.651	-25.0875	-27.235
	63.309	5.5509	20.463
	-15.912	2.6518	-8.1447
	-47.832	-26.0549	-1.7927
	-1.7175	-8.1937	11.594
	21.254	3.4822	15.928
	20.713	3.3354	62.295
	-33.153	-15.4772	-36.936
	28.371	6.1837	18.873
	27.147	1.2829	29.819
	-12.121	-8.5598	-70.239
	-31.692	-12.8421	2.1444
	77.435	-6.3882	87.694
	-30.744	-21.3703	-18.165
	18.337	-29.1121	-0.32106
	35.081	24.1011	1.8529
	59.657	13.5916	61.742
	33.201	-23.7637	29.541
	25.445	-7.7837	57.427
	-57.845	1.5822	-86.501
	-69.904	-10.0999	-36.254
	62.089	20.1217	77.301
	-36.536	-14.4709	-15.799
	-16.421	-9.0775	33.07
	2.3502	3.7089	44.422
	-10.06	-21.513	5.1275
	-19.102	-18.1662	-73.399
	23.63	15.3442	40.896
	-29.54	2.8613	25.305
	-61.294	-87.9015	83.904
	8.3852	28.513	61.064
	-1.0689	-17.7663	53.994
	8.0385	-12.415	-1.557
	4.8606	2.0081	16.959
	-25.096	-68.14	7.9172
	-24.531	-61.6324	-23.946
	-14.837	65.276	-3.5496
	15.797	-53.9542	3.3313
	-5.966	81.2191	-10.648
	-27.515	-3.6326	-27.86
	5.3945	-8.3048	86.536
	7.9696	-13.5654	-12.939
	1.9236	-3.65	-18.152
	10.421	15.9609	7.656
	29.733	2.7035	-1.2611
	-5.5873	1.2321	-23.421
	-55.234	-32.5105	35.837
	2.959	-0.27581	2.1408
	18.564	-24.7615	9.5477
	4.0581	-15.1245	8.0356
	-45.473	-32.7645	-11.849
	53.129	47.9567	45.242
	-13.045	52.326	31.101
	-16.851	-6.8999	3.4124
	-46.484	-27.9589	-42.798
	22.884	14.927	42.252
	-40.323	-49.9791	-44.745
	-6.7079	-2.7845	-3.7687
	7.5224	-13.6025	14.711
	3.1913	1.6501	26.032
	14.58	-28.223	13.995
	29.249	6.1206	58.512
	14.296	-8.8419	6.1239
	31.865	0.27518	25.347
	-5.2664	-7.0235	12.423
	-29.566	-31.4234	3.082
	-20.572	-9.8877	16.337
	13.318	5.6562	19.886
	1.0946	-10.375	7.7611
	60.999	-42.7754	66.526
	-16.062	-32.4819	-12.753
	6.0051	3.5602	3.6028
	20.524	-7.28	31.108
	-4.3707	-13.2056	7.8485
	-16.632	-16.6319	-7.2802
	-9.1974	-2.9655	-5.3521
	-81.114	-36.8122	-70.516
	-27.183	26.8596	-10.506
	-6.4624	-23.5239	18.236
	39.867	-3.5177	27.883
	15.442	-15.995	-11.204
	31.685	-34.0922	-24.074
	23.238	8.2038	36.183
	4.588	-19.6664	11.382
	69.15	-26.873	74.786
	78.669	23.1623	54.751
	1.4423	-17.2923	4.39
	-37.905	-13.1681	-56.087
	-0.38756	0.53695	-0.2729
	3.5128	5.2914	28.578
	13.457	68.9024	26.496
	15.948	3.4778	28.333
	-25.263	-6.3587	-34.927
	-8.361	6.276	13.126
	23.228	29.7611	44.071
	17.538	-37.8145	25.2
	-2.4179	-12.0074	6.8629
	1.2149	55.1522	-1.4274
	27.356	-20.0114	34.264
	16.785	-35.209	33.55
	6.6514	-19.5787	84.837
	-16.677	4.0523	78.225
	6.3579	28.9161	-9.8666
	56.55	-9.8699	63.98
	35.912	35.9363	-74.646
	-48.864	-18.7503	-88.626
	-21.169	-10.2806	84.224
	71.405	6.6454	65.49
	19.739	5.9602	74.113
	31.641	14.0219	68.466
	-36.132	-26.3962	-76.927
	58.521	-5.2648	66.167
	-43.126	7.775	-47.253
	-54.839	9.2113	-55.147
	20.371	-0.42395	64.064
	25.913	23.3656	67.411
	-20.913	-2.8176	89.61
	10.137	18.0837	6.6716
	7.4998	-14.7631	58.418
	-32.57	-3.4874	-48.686
	47.319	21.6423	-56.157
	-39.399	3.5725	-55.586
	-16.003	-1.7879	-49.352
	38.327	14.4797	-63.287
	20.66	-27.5259	-79.473
	-4.6091	-5.6165	-40.273
	31.191	-7.6448	60.324
	-21.639	1.8708	-76.232
	-49.843	31.9141	-66.326
	16.331	-5.0758	-10.44
	-29.073	20.7288	-68.629
	16.078	-12.23	-81.039
	15.752	37.7742	72.558
	62.006	-23.6241	69.097
	-24.821	22.3353	-39.074
	-26.581	-14.4462	61.983
	-4.5397	12.9631	-72.237
	8.8738	-7.1981	-3.4932
	79.74	-2.9486	-18.43
	-37.206	7.1379	-68.509
	49.687	-37.8108	63.511
	-1.5976	0.42025	-88.707
	6.9432	-1.9677	83.728
	-42.896	-28.1421	-54.024
	-14.457	-31.5513	21.967
	-80.49	-15.1055	72.455
	76.843	-0.6852	86.195
	17.46	9.8039	33.618
	-49.488	8.501	-55.541
	78.873	-16.8637	88.17
	-27.214	-32.4639	-22.772
	-19.766	-17.0305	-58.586
	85.579	40.9969	83.061
	15.546	2.7999	-82.874
	83.867	6.9111	-76.28
	-7.3869	8.5158	-56.012
	-2.7902	41.8215	-9.8893
	-14.383	-9.697	-18.088
	-12.535	4.7681	-9.0143
	-21.902	10.2846	-28.771
	16.756	22.6868	87.788
	-8.4363	-45.6183	64.551
	-58.579	-47.0671	67.713
	-59.591	23.1575	77.601
	-26.037	-50.5426	-47.606
	3.2481	-10.3205	36.153
	-17.516	-42.3961	-25.667
	-18.534	-14.5088	-60.945
	23.773	0.85163	-39.677
	-24.162	-18.1354	-61.96
	-10.268	17.1949	77.992
	9.5195	23.416	30.283
	-32.354	74.6954	-44.241
	-30.189	-17.8637	-35.595
	-6.5468	55.3959	0.16097
	-8.7275	-11.9923	-41.531
	-8.8282	4.3235	-27.197
	-13.267	-15.1075	-54.676
	-25.349	24.4179	-43.07
	1.3314	-1.7547	4.5184
	9.036	8.0532	13.281
	27.714	0.76342	39.71
	-2.8439	37.0115	73.472
	12.219	-3.6479	77.669
	-5.4251	2.9244	25.273
	-14.522	28.0702	-59.108
	11.28	-0.062048	-2.4538
	-34.921	13.0688	2.5489
	-8.3007	-30.9811	-14.421
	-2.3813	-22.7279	-4.478
	-4.0701	13.3034	-2.8934
	-36.222	3.7517	-76.616
	9.4146	39.9459	19.221
	-16.234	-42.1625	-55.55
	-2.3348	17.0879	1.9724
	16.011	21.5748	21.296
	-12.423	-0.68722	-22.264
	2.8205	14.9721	11.844
	-20.249	60.4029	-57.229
	-3.3697	13.7708	12.692
	-18.499	-2.3139	-24.679
	-9.6078	3.9931	-6.1432
	48.544	12.7449	64.963
	10.907	-1.5348	3.9334
	-13.124	-1.5241	-67.074
	-36.431	16.0909	-72.392
	85.153	-9.2934	-76.275
	14.795	29.1203	-10.516
	4.9352	21.1623	-36.947
	-1.6158	24.3386	7.106
	-5.8189	11.9835	0.57879
	53.106	6.4013	70.684
	-31.799	41.1082	-44.044
	-11.783	-38.9859	-17.426
	0.029526	12.7279	-8.3636
	-22.942	67.8182	8.462
	-23.669	7.6766	-8.3644
	1.56	55.6103	45.222
	-15.086	-3.2903	8.3434
	-0.23901	-5.2872	-1.2384
	-5.6472	2.5083	-18.334
	-19.515	59.5992	53.503
	-12.804	3.6583	-20.413
	26.931	36.7714	41.603
	12.152	7.9087	79.031
	-15.546	25.981	33.895
	-9.178	-6.2273	-12.497
	-25.31	-3.4394	-70.716
	1.269	6.2762	-82.197
	10.859	34.8334	-32.84
	-28.614	7.5621	74.932
	-9.6009	9.3941	-15.537
	-47.398	-13.2508	-35.281
	8.7026	9.5763	-11.881
	7.6632	-21.418	-20.418
	-14.985	-19.7453	-27.434
	11.419	-2.5272	-16.415
	-1.7674	-31.9841	-25.12
	1.3034	-16.3714	-8.8526
	2.6729	-25.5298	-12.803
	43.702	-18.4797	-18.621
	-0.10269	-64.0152	-17.25
	-1.4431	-11.4873	-13.5
	25.434	28.0955	2.1638
	-4.0517	13.227	-20.398
	-11.66	13.1967	-11.295
	18.765	80.357	-0.86462
	9.3818	11.5771	-5.2311
	-78.789	5.4411	-41.041
	-1.602	28.6412	-17.677
	15.323	14.4139	-27.161
	-32.676	1.0995	-22.927
	5.0341	-80.749	-2.8907
	19.202	13.7914	-20.668
	15.739	-28.1889	3.9574
	-17.53	-13.4387	-17.605
	22.638	19.5376	-20.045
	8.4666	16.0207	-10.133
	1.5488	-23.8382	-8.9804
	7.1144	-21.1006	-11.822
	6.5626	-1.1615	-6.2578
	72.028	23.1265	-22.415
	-22.364	-14.428	-25.184
	1.9965	15.2148	-15.577
	-18.12	-40.0554	-17.598
	-17.196	-6.73	-25.244
	23.219	-20.9426	1.3274
	-76.284	-33.9455	-17.259
	-12.683	-35.7388	-14.595
	-0.81004	-50.6577	-26.953
	-29.016	-8.9098	-31.684
	-1.0085	-31.4408	-16.71
	4.2029	-10.5886	-5.8474
	6.4249	-6.3791	-19.988
	13.377	-11.2766	-10.289
	66.384	-27.856	-1.4416
	4.7108	-20.6442	-2.7485
	-4.8402	13.978	-22.83
	12.558	-22.5257	-15.302
	-4.5739	16.759	-24.001
	2.691	-9.1736	-14.414
	-6.6768	-1.4002	-20.05
	0.36285	-31.267	-12.787
	-2.3088	-22.6962	-11.568
	-14.664	-29.7558	-17.176
	-14.096	-57.3251	-26.137
	0.099982	-3.2063	-10.264
	22.676	82.5983	2.0769
	16.771	-55.394	-13.093
	-1.7298	13.7579	-21.583
	2.264	-2.5272	-5.4527
	6.1463	-27.5077	-13.064
	9.2643	-17.6352	-5.6563
	4.4807	-12.6947	-5.0669
	-14.306	-4.2368	-30.139
	14.506	8.4039	2.9805
	4.8189	7.033	9.9067
	2.3437	-24.5384	7.5215
	2.3616	-20.8921	11.563
	9.2522	-6.9356	18.342
	37.008	-19.8339	41.129
	16.605	3.5676	1.7865
	1.8295	-24.6393	4.6767
	17.617	78.3525	18.346
	29.059	1.1318	24.054
	-27.768	7.4516	-0.76096
	2.6944	-31.3866	0.076081
	-11.839	-0.32601	4.9474
	-46.143	21.4592	-13.689
	43.621	-13.8313	25.335
	3.2101	-0.31841	9.3129
	-5.1934	-21.4421	7.1016
	2.2431	-20.2771	-1.6294
	6.5544	-18.0944	-6.978
	26.114	0.24612	5.0247
	13.319	-21.14	32.252
	-0.37941	1.3772	9.2189
	6.1031	-4.353	2.1958
	67.088	-29.9957	24.708
	23.031	-8.5311	23.37
	4.1837	-14.7956	9.9773
	-2.948	-5.2142	4.8988
	10.108	-9.1691	39.72
	11.876	-10.2765	7.1468
	0.52956	-0.89134	14.377
	22.104	-0.70473	18.709
	34.574	-12.8457	31.522
	-24.469	10.9253	-17.568
	15.677	-32.0561	21.64
	38.796	-5.035	17.04
	3.854	-21.1504	19.384
	19.884	-16.4603	35.466
	-5.3156	-21.743	-5.7363
	32.811	-26.3106	25.97
	6.2927	1.4519	22.657
	4.6262	-15.5048	7.2923
	5.3699	-6.9586	19.415
	33.132	11.4009	19.663
	19.577	-11.2465	9.6445
	21.827	-13.2462	33.156
	6.8955	-10.6773	16.295
	8.6254	11.076	25.672
	12.998	17.6029	22.801
	30.137	-2.0896	27.207
	14.929	-9.5375	-7.9737
	15.749	-43.5958	24.988
	-20.024	19.659	2.5599
	3.4957	1.4207	11.887
	19.506	-22.1632	17.731
	-7.7867	24.4713	-6.1263
	-15.037	-2.1553	-3.4363
	32.694	4.2007	24.278
	-6.8617	-11.0302	12.449
	-12.805	12.3983	-6.7443
	-8.2294	4.1631	-0.60355
	12.621	-24.4123	15.578
	20.623	-64.2226	6.225
	11.22	-4.0178	16.686
	-6.2101	36.34	-13.258
	-18.198	4.4743	14.561
	17.119	19.3821	13.942
	23.72	7.5724	16.468
	14.459	0.10348	32.719
	-3.4143	-2.5447	-7.6609
	-1.1053	-16.1713	-1.3252
	84.166	18.171	-8.0018
	-68.425	2.9269	-67.087
	25.666	30.2726	27.818
	14.109	4.396	16.41
	-1.5135	-30.4752	5.0416
	4.9927	8.6546	14.712
	-1.0873	-4.0545	0.9908
	-0.88906	5.973	5.2815

## Sheet: w-o de novo induction
Fig.4D-L De novo condition - Cell, Stbm, Microtubule orientation
	Cell orientation	Stbm orientation	Microtubule orientation
w/o de novo induction	-3.7274	59.0001	19.94
	19.917	-11.8532	19.895
	21.301	-81.1083	26.911
	76.343	-85.063	18.371
	-34.815	-18.778	53.421
	-15.547	-23.9804	-12.059
	31.467	-43.4863	29.642
	8.2731	63.6209	-1.5087
	67.017	27.5105	60.661
	7.6384	0.88274	33.604
	-8.939	-25.4405	-50.092
	-4.1053	23.9905	17.911
	-11.663	-10.0841	4.9653
	14.061	20.693	22.817
	46.762	22.5291	41.579
	-10.957	41.4024	9.5423
	-8.2332	-32.4764	-19.092
	14.233	56.8503	7.9746
	-5.0987	32.844	34.256
	28.462	10.9231	35.603
	10.064	36.8457	30.835
	-9.9229	-31.9623	2.1154
	16.133	57.6028	14.958
	-79.909	77.8142	88.209
	41.137	33.9113	25.111
	-41.255	2.22	-61.881
	-20.859	-82.0889	-44.221
	-0.26043	-85.6048	-29.171
	1.2972	-8.5472	42.627
	1.9106	-39.0788	22.949
	-25.247	-66.8371	-26.908
	42.879	77.7535	38.914
	29.166	88.7874	62.561
	-5.8591	37.3882	-18.473
	-22.017	-19.4063	-10.508
	-9.5608	13.4681	-21.393
	-8.2706	82.0435	60.598
	11.505	62.2582	29.133
	4.6613	-32.4208	46.494
	46.01	46.0495	40.365
	50.637	86.8442	75.5
	64.645	81.4745	73.075
	10.166	87.5915	38.801
	1.0117	4.31	-21.396
	-9.5275	36.2416	-6.9022
	28.826	72.0699	15.78
	32.731	-88.4598	38.327
	6.1771	-27.9826	43.59
	29.493	62.9737	48.851
	-81.709	-88.4529	-84.98
	5.831	70.9062	39.592
	15.029	19.9266	19.923
	15.525	43.1414	30.209
	46.06	40.8886	53.679
	13.204	28.0405	50.496
	18.201	68.2839	3.0095
	-6.0575	-58.1321	-5.0889
	1.098	10.7749	26.021
	10.627	-16.6755	19.633
	74.862	31.4618	83.714
	41.451	36.6502	56.947
	-18.717	-40.4086	33.499
	52.732	14.5357	63.736
	30.413	-14.0879	33.536
	-27.871	0.59776	21.314
	-6.0177	-34.4444	52.611
	-18.215	-36.7488	12.229
	34.949	10.4572	42.915
	80.245	-68.6759	58.93
	51.259	87.5669	86.611
	1.9306	41.1246	38.463
	16.206	87.395	71.415
	11.399	88.3786	28.913
	-5.9571	84.167	12.491
	20.44	26.3832	14.181
	-0.30611	-4.7152	-2.9327
	-4.4881	87.5161	8.7475
	2.7466	-30.9466	13.603
	11.448	43.3265	0.63549
	-7.3905	88.8309	28.207
	18.035	39.1041	14.449
	21.663	-81.8204	20.55
	32.04	76.2581	32.071
	-23.98	-67.5575	-4.3411
	10.22	23.0438	9.0284
	-9.2352	48.4839	17.334
	13.205	8.6489	11.333
	-2.9613	33.5352	12.736
	10.325	9.0969	25.299
	9.3394	-63.4067	2.0094
	3.5307	59.9062	8.3951
	-21.096	-76.2303	-8.3974
	39.819	55.1173	42.515
	-19.517	-59.4309	-11.58
	-12.774	-22.7467	-7.9097
	11.894	28.1905	-0.20332
	9.5396	37.7421	22.838
	2.0528	-68.2804	22.345
	0.63244	24.8077	9.3511
	-1.829	33.8846	-3.2741
	-51.829	-15.4288	-16.369
	14.246	55.9453	35.896
	7.9197	17.5429	4.741
	18.462	-75.0392	10.088
	-5.3721	48.653	1.7922
	12.381	83.2612	20.874
	24.616	44.5101	14.656
	-40.661	85.5088	-38.504
	18.134	40.4993	26.962
	-8.702	77.0835	-7.2675
	-48.414	21.9039	-41.308
	5.4636	-32.4952	14.481
	14.01	34.6297	28.987
	-9.5106	19.4544	-4.7378
	7.2644	82.7131	-10.668
	10.173	-86.162	20.096
	22.852	-86.285	37.921
	-7.8833	-45.6557	2.1179
	6.4515	5.0442	25.316
	21.487	-12.3929	33.469
	30.58	24.9439	-1.6688
	-10.926	-6.8305	7.1621
	-10.552	-24.119	-3.2334
	7.1522	34.6173	12.098
	-24.773	-48.6102	-0.61776
	-21.524	-40.913	32.941
	32.362	28.4192	29.807
	-17.287	-2.8876	52.589
	-25.511	-71.6276	-17.321
	-24.852	67.8024	30.538
	-12.992	-41.3419	0.34726
	-17.503	-6.861	11.524
	7.0765	-10.4288	13.506
	-37.484	-12.7611	-39.177
	-39.801	3.3325	-32.219
	-10.375	-80.23	-27.567
	-60.011	-62.3482	-73.852
	4.9491	88.3497	5.7327
	53.638	33.5511	78.822
	-52.107	-60.6347	-53.901
	12.219	51.0744	-8.5463
	-63.903	-35.0366	-19.424
	-20.644	-71.6007	-20.955
	-37.503	-64.1379	-42.454
	31.958	-24.91	28.118
	24.949	-39.4914	-3.9148
	18.19	89.1519	4.3548
	-78.542	-67.0154	82.282
	-18.564	78.9833	-19.3
	6.5254	8.9218	10.294
	5.9575	-48.2833	-3.5712
	88.951	-41.174	60.111
	26.031	83.3628	19.597
	27.633	-22.9318	85.601
	-23.255	89.73	-35.891
	35.316	82.8348	10.49
	78.202	20.2553	-70.305
	26.216	-60.9157	34.702
	4.6251	-45.4841	-22.292
	-80.305	-36.8716	-56.197
	24.724	47.9085	10.234
	78.385	-28.0252	85.269
	38.969	31.5678	51.146
	4.7962	-81.4108	-32.617
	-14.794	4.1427	-19.973
	32.003	70.1392	28.655
	4.9607	-30.461	-14.393
	25.82	64.3537	-32.739
	41.675	44.5581	-84.114
	-27.433	69.1078	-0.52833
	-75.825	32.8746	89.924
	19.848	-75.7889	2.0883
	83.636	17.0071	48.813
	53.984	35.2742	-63.468
	17.986	-62.4613	7.3104
	-10.873	-72.4851	-29.337
	13.453	-27.4589	5.7001
	-75.026	20.4842	-45.706
	31.79	-10.4377	41.381
	28.809	58.1091	-5.1411
	45.234	1.2931	76.392
	-26.909	-81.9472	-31.281
	-24.05	31.958	-47.374
	33.442	-18.8687	29.826
	-64.897	18.538	-27.759
	33.851	61.3096	37.893
	55.82	-8.7361	49.394
	-54.725	72.0106	-38.749
	75.573	85.4924	79.827
	-79.533	52.5812	-77.806
	28.919	86.2006	19.91
	33.009	56.8442	33.765
	67.969	63.3095	80.786
	83.166	-6.9593	72.604
	61.731	52.1348	-46.936
	-76.594	83.5299	-27.495
	53.521	-59.0052	-71.967
	51.616	88.7212	59.388
	26.09	87.1372	-43.007
	-8.9819	57.465	-19.114
	70.845	-5.3416	-38.314
	34.623	62.4058	39.057
	64.449	19.2457	55.856
	-79.532	87.4361	13.34
	-17.379	-0.79984	-15.901
	45.238	49.2042	10.541
	56.856	67.7634	52.882
	43.708	-77.1808	-58.915
	31.387	48.4336	-39.184
	-12.671	-58.3999	-28.111
	-49.411	-13.575	-28.063
	85.164	1.8451	-38.905
	45.442	18.3547	89.077
	-69.493	-46.4855	87.867
	36.699	39.0033	-6.5036
	63.398	72.1984	-26.251
	37.985	-7.9214	-47.663
	-31.302	-31.8454	-68.663
	54.725	-23.3679	77.818
	-61.128	55.8539	-39.019
	-3.9312	-1.3735	-50.557
	-20.08	50.9591	-71.817
	83.134	34.3476	-21.152
	-59.544	69.108	59.503
	-3.5678	2.1563	-26.778
	1.5364	78.4692	28.755
	-89.562	-21.866	-74.668
	42.42	58.1385	54.81
	-32.737	-67.9729	81.545
	48.485	-33.2509	64.886
	50.046	78.6152	-60.911
	-4.5205	44.6338	-14.701
	-36.041	-2.8337	82.597
	-42.249	-12.0376	-68.976
	-10.611	-83.65	-41.095
	-39.727	65.4239	-28.665
	-19.747	1.1715	78.233
	33.077	-49.0781	-66.097
	-12.427	50.6933	-44.478
	23.362	-74.4916	-19.066
	55.146	74.9227	56.763
	-39.726	40.379	-75.899
	24.077	-74.6379	87.37
	-20.856	-77.652	-71.14
	-66.132	-70.4005	-53.779
	-68.772	46.8449	69.185
	22.014	38.5005	-9.7761
	-44.926	-87.9025	-71.134
	-0.77463	62.4591	-66.554
	-32.844	-52.3188	-70.418
	-41.421	-86.2734	83.638
	-39.593	16.1138	-75.554
	-69.345	-55.7328	-84.972
	79.235	45.832	54.152
	89.36	85.3611	-63.331
	-44.676	-46.8369	-63.482
	-50.175	55.0017	-86.902
	-11.759	-32.0398	-70.386
	-19.224	-78.9513	-19.08
	2.7056	-7.6302	-8.3838
	-9.9684	1.4445	-32.779
	0.75912	-63.5081	-24.374
	-30.179	-20.5596	-45.617
	-19.715	32.1764	-32.959
	29.584	-2.8199	50.38
	-52.284	-68.9366	-85.975
	5.5392	-26.076	45.625
	-81.53	-75.7693	-53.061
	-24.809	-49.3359	-67.318
	-64.847	-78.7983	-71.86
	80.306	5.458	-29.11
	88.331	68.4567	-18.196
	-73.549	65.0623	-54.613
	-48.856	-59.1702	-37.756
	69.167	46.8143	-19.788
	-37.511	24.7441	-35.453
	-48.575	21.2155	-27.391
	73.87	58.1935	-24.866
	-71.822	-80.254	-27.78
	43.612	5.7401	-86.169
	-31.823	14.3749	-30.174
	60.892	-73.2866	-41.684
	81.803	80.018	-47.582
	63.968	63.3374	68.371
	-38.132	-51.9107	-53.003
	-21.902	39.8427	-39.601
	76.122	61.8031	-25.464
	62.836	55.343	-39.446
	-45.06	47.774	-33.575
	-77.734	-46.8015	-60.537
	58.62	-48.0128	-48.896
	70.568	-7.6419	-43.407
	-67.069	-2.3842	-28.573
	84.919	-17.8109	-62.495
	71.709	-74.8421	-51.784
	87.933	65.0399	-59.148
	-63.309	-53.3533	-36.839
	-72.514	-39.9705	-67.895
	63.351	-47.4505	-46.943
	74.194	-77.8049	-38.867
	46.258	-34.5779	-33.526
	88.003	14.8642	-44.855
	-88.162	-57.4068	-85.078
	28.579	10.1529	19.098
	-9.7857	19.6017	-30.294
	-36.829	-30.3377	-39.612
	-29.379	-21.0223	-45.97
	87.683	-64.9956	52.464
	-82.364	42.7544	-55.106
	-51.848	-59.0411	-41.292
	86.466	38.165	-62.344
	-83.404	-71.5305	-47.329
	16.906	4.2411	3.6433
	-80.213	-22.4453	-41.524
	-83.264	82.4501	-56.373
	39.291	-67.7066	-27.679
	70.654	67.9594	-40.132
	-45.482	-36.0951	-34.298
	-81.424	-63.5481	-40.257
	57.545	20.4782	89.363
	17.215	4.3815	-41.649
	-82.743	57.9785	-21.597
	-74.422	-75.7333	-46.819
	78.87	-81.8207	33.073
	23.873	36.638	-29.262
	55.108	38.6009	-33.478
	-4.4102	-50.3526	-25.756
	10.839	22.4277	-7.204
	19.486	-47.2553	66.961
	-17.31	15.9305	-34.846
	-6.5173	-50.5255	-6.6268
	-24.5	-21.8402	-12.129
	-3.4377	0.11945	-20.147
	-5.2233	-64.3014	-2.6085
	0.038344	-7.9695	-57.055
	-5.8186	-45.6029	15.025
	-11.525	-4.8938	-3.4857
	10.755	-61.5118	-54.253
	10.856	30.5439	13.742
	-1.418	-10.6381	1.3774
	-32.336	55.3869	-48.652
	-15.538	-36.0093	-34.012
	-33.583	-34.0363	17.212
	6.5277	-18.2166	-5.1969
	5.3221	22.5826	-13.131
	-4.8356	-81.8782	28.918
	-0.24567	1.4436	-8.5459
	-21.752	36.3074	-17.7
	-34.065	-18.9169	-36.316
	28.997	72.0103	-33.46
	-30.072	-42.7748	-33.576
	2.478	-66.1813	73.229
	4.1737	-30.624	10.298
	-10.519	56.5281	-45.844
	2.4323	-2.0184	-7.9711
	-8.9396	-63.1973	-9.7662
	-7.6741	-1.2043	4.0418
	-20.109	21.4312	-30.809
	-1.1668	-80.8256	-3.1976
	-7.5928	58.264	-7.7097
	0.73441	38.4177	10.648
	-28.995	-46.2513	-31.523
	2.8251	-89.4153	-59.106
	-2.0144	-37.4557	-11.48
	2.5493	-12.8979	7.2418
	-17.922	15.242	-27.161
	-2.8104	8.9783	11.806
	-17.861	-44.0269	-29.328
	-2.6224	57.5754	16.688
	-11.343	-2.0388	-21.768
	-11.572	-6.8424	-44.467
	-6.2174	-14.1422	-4.8678
	20.781	51.0828	-14.594
	4.5699	22.9369	21.561
	-19.97	26.4464	-19.258
	-28.194	-57.0173	-24.437
	-9.6401	-36.2179	-31.578
	-16.776	2.4666	-24.009
	-5.4367	6.3868	-5.8129
	-5.0064	-19.5237	3.2912
	21.578	25.4039	29.099
	-32.25	33.3882	-17.592
	3.3328	50.6096	51.181
	-34.242	-45.2284	-19.885
	-13.443	5.9234	-3.7419
	-16.842	55.7593	-35.123
	-0.77006	37.5116	13.989
	3.5257	-83.4729	-3.4573
	-7.6091	-30.9919	-33.325
	-15.674	-4.5183	-31.808
	27.293	68.6814	4.3805
	-10.684	68.6322	16.008
	-31.155	-32.7344	-44.562
	-25.143	1.3187	-10.483
	-2.0781	9.7229	10.689
	-13.947	28.6606	-53.684
	-14.93	48.9272	-20.516
	-4.8305	-38.487	-3.263
	-0.7181	-5.7287	-9.5363
	-21.108	21.0971	-19.528
	-23.617	-65.4226	-20.885
	-18.749	12.6897	-22.916
	-25.158	68.7595	-46.507
	-12.336	-12.522	-8.5616
	-17.879	-19.4312	-48.99
	-28.021	-56.8508	16.55
	6.8243	75.4923	-12.257
	-22.187	-21.5871	-39.512
	-23.79	49.1277	-10.109
	-24.488	-42.7021	-35.041
	-32.033	-81.4747	-24.993
	-25.864	-71.9659	-14.819
	-11.478	62.1593	-68.424
	-15.077	-37.4489	5.769
	-0.079302	18.023	-5.2476
	-31.574	-75.242	-40.761
	-10.528	18.4998	-9.5563
	-16.156	50.7597	-11.241
	-10.133	-42.5361	-11.1
	0.84325	-16.0551	22.254
	25.14	54.6622	88.91
	14.159	50.7577	10.713
	28.251	26.3393	43.132
	-32.646	-84.1989	41.341
	35.699	39.1602	25.868
	31.386	40.9372	61.916
	14.985	-12.8809	2.2189
	36.186	-43.8069	55.522
	37.414	49.5497	31.687
	32.87	-1.3433	48.074
	23.318	-88.7934	-17.785
	23.171	21.8513	21.787
	54.383	-74.0664	13.457
	46.226	-89.069	88.566
	49.804	43.1707	42.503
	76.121	-45.1556	46.273
	57.588	-71.8838	47.765
	-9.3658	-37.7237	-18.987
	33.903	45.03	-4.8087
	22.883	-29.4045	10.486
	-15.62	35.4299	-12.298
	77.877	8.0998	62.814
	61.162	89.8701	24.395
	1.6857	29.7846	15.621
	-63.512	-84.2559	-82.182
	-89.835	58.0749	-8.6731
	-51.354	-54.4975	9.6421
	-36.618	87.3368	-17.051
	-22.451	-53.1083	-22.448
	-47.667	-51.0568	17.225
	59.619	72.2193	43.243
	-81.586	87.4282	-76.072
	1.7328	53.8405	2.3299
	4.2278	-54.0555	-7.7873
	-10.936	66.2857	16.804
	22.295	20.7559	36.657
	13.581	-36.2223	-9.9853
	18.561	-70.413	4.9263
	-1.5936	-89.5075	-3.5919
	62.451	-44.5314	24.977
	-8.4232	-37.3714	4.8207
	71.889	-38.3752	-87.98
	10.069	-61.8921	-10.554
	-50.793	-69.8112	22.607
	24.256	-36.0006	1.6712
	6.0462	-68.8707	-21.637
	25.267	-77.8104	15.436
	35.036	-84.9542	30.933
	64.441	-42.7942	74.583
	16.243	-69.0189	28.667
	9.073	-87.1291	17.363
	-6.1422	-37.9109	-3.3231
	30.149	24.2922	35.339
	-4.0537	-36.9768	11.135
	-31.503	67.7014	-7.9976
	5.665	-6.245	-0.30839
	9.3753	46.4723	2.0802
	23.798	-31.827	-10.979
	-10.093	-53.7367	-21.164
	-22.762	-36.3182	-3.4563
	28.369	-17.1526	31.608
	86.505	-81.2936	40.177
	13.853	-63.8518	-51.359
	-61.557	-54.7379	3.3212
	-15.66	79.2105	10.836
	52.02	-87.7583	43.734
	-29.455	-58.2325	-41.571
	30.52	63.8715	-18.923
	17.32	-54.7039	-30.586
	-2.6004	-48.5745	-0.48545
	43.946	-13.5018	-62.048
	67.911	-69.2257	-25.423
	-60.023	-79.422	-38.466
	-89.633	-78.5514	-51.857
	0.17129	-65.6487	4.1944
	-24.652	-24.3368	-32.795
	9.7894	46.6129	-21.072
	-42.413	-80.3899	-12.383
	-65.505	-62.3579	-78.025
	47.963	64.1407	-35.049
	-12.945	13.7969	-25.907
	-40.058	74.1578	-30.926
	10.809	46.3173	-20.318
	-18.059	-81.9371	-26.651
	-9.278	11.0894	7.5006
	-50.483	24.2902	-52.527
	-65.634	-53.7093	-53.678
	67.383	53.6464	-65.378
	-13.522	-65.1002	-15.451
	-52.804	-51.5867	-52.99
	-75.551	75.8526	-59.875
	-66.629	24.3601	-67.405
	-27.022	-16.7405	-11.526
	36.094	66.346	35.625
	-14.986	-1.6935	-9.0076
	-16.685	87.4271	-18.662
	34.086	-58.6946	-6.8334
	-72.69	-59.5196	-63.639
	-53.01	88.1728	-76.6
	23.874	17.8928	16.253
	-37.252	16.1077	-65.971
	48.093	53.9529	-86.021
	-2.2446	35.0255	-14.754
	-66.321	56.0364	-54.231
	5.3187	24.5749	-26.349
	51.767	-60.8233	76.898
	-7.0814	-59.2968	-4.4822
	22.636	40.4812	47.5
	63.354	-74.1779	-49.284
	34.638	51.735	-84.782
	-1.1789	51.5288	-0.53075
	32.662	-25.7579	-22.844
	-36.826	-72.6111	-38.551
	61.565	-81.2921	64.083
	64.666	-74.6088	-67.901
	-6.4085	-32.1168	5.4561
	16.62	58.1129	2.307
	-5.7866	-30.9806	30.918
	-45.209	11.3484	-46.759
	14.209	45.3002	2.0371
	-12.29	44.3116	-15.393
	73.909	50.9909	-62.819
	-33.54	-18.8785	-33.615
	3.4069	-7.8075	-1.846
	6.0578	-36.9541	1.6875
	-10.081	60.9077	-13.375
	-20.951	84.6738	21.62
	-2.0759	79.7639	-6.1797
	7.423	15.3859	-12.761
	-47.048	-75.5613	-39.141
	-47.428	-58.426	-87.796
	-21.16	-59.0238	-25.324
	-15.718	7.2208	-19.821
	-0.016092	24.5796	7.8211
	5.6961	27.9448	2.0169
	-12.696	-21.3234	-14.911
	8.748	-47.0854	-10.13
	11.904	19.0875	10.417
	6.8666	5.5466	-14.964
	45.285	34.0937	44.112
	22.268	68.0715	34.329
	-62.104	40.7707	-21.06
	-18.58	-47.4032	3.1731
	31.582	40.7081	65.935
	-40.765	7.7279	-60.593
	10.666	-65.4873	20.553
	-81.758	-54.3662	44.988
	8.4748	-37.1993	20.633
	19.287	36.7137	5.1041
	73.221	43.0382	-47.142
	67.02	-75.3281	46.827
	-54.749	-89.909	-59.721
	-0.38786	-48.4437	-24.898
	-63.253	-89.9284	-85.32
	4.8476	48.5921	3.0209
	58.766	43.7636	26.827
	66.442	39.6139	87.292
	-17.855	13.2547	-3.2911
	15.706	34.396	21.401
	76.592	41.1098	-8.5593
	22.387	-37.5876	40.814
	6.84	-88.4305	45.56
	-64.468	66.3825	-63.843
	-54.451	25.6204	-8.996
	-14.255	-1.3401	-13.833
	46.05	71.7554	47.27
	40.869	-41.5645	11.937
	6.9963	-36.3556	8.3083
	-23.139	-57.3445	-4.227
	59.517	-61.0683	41.35
	62.564	77.308	53.854

## Sheet: with de novo induction
Fig.4D-L De novo condition - Cell, Stbm, Microtubule orientation
	Cell orientation	Stbm orientation	Microtubule orientation
	52.858	76.7809	-13.909
with de novo induction	55.184	68.426	66.326
	-79.308	-83.869	-60.374
	16.978	-71.4554	24.82
	-74.064	58.4503	43.132
	-6.3038	-63.4458	10.621
	-54.778	82.7615	-33.301
	32.118	85.4813	6.6596
	-32.113	-66.0344	-13.127
	27.628	-46.207	30.337
	-0.49432	40.027	-26.331
	-30.24	5.5571	-39.411
	19.705	58.0863	-10.755
	1.3651	23.3842	7.0132
	-8.7534	13.3587	20.703
	17.857	-70.8225	-86.344
	16.315	-41.8969	8.1224
	49.314	-68.5338	34.125
	23.57	43.6557	24.84
	-3.8523	4.3018	-15.343
	-34.322	-29.0675	-17.176
	30.979	75.0493	-5.4371
	36.396	88.4172	37.611
	-9.3751	-17.5276	3.9869
	-32.758	8.2758	-42.157
	1.9081	3.9302	31.609
	-14.336	-56.6854	38.803
	-14.538	-22.8968	-4.7496
	46.524	36.8169	52.457
	-11.843	-11.5871	3.6366
	23.217	-9.4253	48.107
	-1.9077	-7.7311	0.018099
	-39.743	-26.8132	-18.785
	13.004	-37.4698	20.405
	41.278	35.4669	29.565
	6.664	-8.4785	14.289
	14.049	1.4484	20.752
	10.495	-42.7135	-11.318
	34.655	5.4228	8.4856
	22.207	31.2203	10.058
	34.599	50.3055	59.323
	12.047	-32.0199	-6.7937
	-1.8398	-4.4204	-10.207
	15.146	69.9317	34.066
	58.005	-48.2098	14.564
	35.827	35.642	31.531
	-5.7348	-72.2201	31.899
	32.668	-77.3054	3.7667
	-25.369	-28.7067	-67.828
	25.278	71.1615	32.303
	38.676	39.8468	69.061
	29.077	6.9638	45.572
	1.458	-8.916	11.314
	24.032	56.0811	-7.0262
	-56.205	-78.1679	-32.33
	0.177	-2.6925	-8.0853
	41.61	22.3828	54.832
	-1.4299	45.318	-6.3028
	-17.464	-54.2871	10.263
	7.2818	-16.2116	10.674
	-44.693	-75.9197	-46.431
	22.473	-85.8993	7.3059
	45.626	46.5755	26.776
	20.48	87.007	7.8487
	36.543	-72.0904	62.872
	11.714	4.1938	0.34209
	82.526	58.5177	64.987
	-47.505	-54.26	-24.749
	21.788	58.481	30.328
	-8.1587	-41.4561	-81.514
	22.302	18.0691	36.721
	14.481	-14.0934	26.074
	-9.337	-24.0299	-39.888
	29.701	-43.5294	-2.555
	7.0212	23.3762	-42.359
	26.991	-73.9812	26.041
	42.873	-23.9012	47.995
	16.426	-15.7281	9.6539
	51.47	38.0464	13.593
	14.552	12.4037	17.416
	1.7197	-4.223	26.883
	52.718	33.9828	53.775
	14.031	-38.6746	33.559
	18.612	31.5421	-15.897
	-5.0658	-6.8688	-2.7182
	19.548	18.3604	17.378
	38.806	64.7428	35.219
	8.9064	-54.0463	20.769
	23.593	54.2303	0.69011
	1.7516	-62.8348	-17.815
	8.4235	-15.5771	10.917
	2.1374	31.4358	80.716
	37.184	-36.598	32.783
	19.251	35.0761	35.626
	22.489	26.3304	3.5079
	11.917	71.1775	1.8633
	9.58	3.6786	2.8751
	79.725	10.0474	-40.467
	5.7757	-11.4915	-9.5644
	0.9191	-23.7106	-15.29
	9.2208	79.199	15.903
	2.6228	31.6918	-2.1005
	-17.084	-47.5916	3.0794
	3.9425	14.2083	4.512
	11.699	-11.0065	3.3981
	-8.2771	77.2113	-24.162
	27.747	60.2338	14.035
	29.096	63.8933	-13.885
	15.93	-26.6372	11.802
	24.143	62.8952	12.408
	30.328	-55.8622	21.626
	13.813	12.0787	-4.2623
	-2.0444	-46.5414	-13.338
	7.2866	-16.5906	-20.375
	24.131	37.798	37.881
	77.376	-88.4177	-60.776
	-2.5243	-12.5419	-5.2448
	-4.1181	-81.4854	3.3107
	19.46	-12.1258	9.6241
	6.7086	9.9311	-3.403
	9.9389	-32.6151	3.5278
	15.905	66.5111	23.32
	-4.5078	12.2691	-0.094384
	50.059	56.7723	30.192
	80.09	83.5603	-46.209
	-77.89	46.4504	15.596
	20.32	11.1056	28.753
	25.701	38.9733	10.744
	34.72	53.5138	13.217
	16.98	-45.1581	1.8677
	-74.081	58.2461	-48.348
	10.899	-4.4007	-2.3225
	28.931	36.1991	17.556
	19.921	-63.5399	9.094
	26.681	-60.8321	18.18
	9.7249	-26.7081	-30.035
	31.078	21.6349	-1.4911
	21.425	28.3792	13.8
	-0.94828	60.2415	-1.1998
	20.062	-59.336	18.122
	29.519	36.0748	22.151
	32.416	67.0655	5.2536
	27.16	13.5946	12.056
	49.919	-68.2714	-35.284
	2.1064	32.4057	0.081119
	-17.162	-12.1217	-7.9113
	33.745	22.3776	0.52946
	-0.53269	9.2996	-6.3515
	-2.1334	6.4251	-5.4405
	28.97	79.9012	22.411
	16.183	44.6268	37.607
	20.202	83.2532	6.019
	31.808	68.9452	-13.822
	39.633	68.7672	21.749
	20.449	-44.1669	11.53
	-3.8597	-16.1546	-12.471
	15.066	23.1829	4.9468
	21.515	-25.2222	4.0248
	5.6852	-86.9035	9.3584
	-40.307	18.4643	12.807
	-24.399	59.9324	-11.331
	10.411	-62.7426	-3.011
	67.266	19.2121	45.777
	39.007	29.9848	11.717
	-11.243	-63.9354	-8.5477
	8.7702	25.1633	3.4383
	26.048	19.994	20.66
	51.624	71.5864	33.793
	22.329	-22.9376	6.5364
	-26.371	46.7409	-10.577
	83.927	60.8777	77.746
	44.351	-88.3832	-22.437
	28.153	63.6993	11.6
	-41.592	20.1429	-15.244
	21.806	10.6679	-27.927
	-0.88772	30.6649	-24.77
	46.35	21.0462	43.28
	13.793	-20.1506	4.3487
	18.594	-78.4264	6.6453
	32.977	-1.2127	3.9859
	53.877	79.2957	35.135
	15.447	26.3361	3.859
	23.147	-20.9518	5.3471
	12.579	-58.5447	8.7964
	43.787	87.6444	32.755
	-8.5914	-58.2403	-1.9237
	31.585	6.9228	19.262
	3.8741	-65.3593	-8.0463
	35.958	31.6894	-0.23026
	14.102	67.865	4.5897
	12.36	55.492	7.8273
	8.5698	4.7479	8.1281
	16.876	29.7819	10.485
	24.471	61.3823	8.6721
	-12.519	-43.0392	-15.402
	19.297	-62.9031	2.6613
	-33.699	59.2845	-7.1151
	19.781	-48.7101	-0.53292
	58.054	-63.4687	3.8092
	13.222	9.8418	3.5652
	-9.3473	-5.3415	-21.758
	28.079	43.9589	18.699
	10.215	-42.8654	-6.6605
	7.7843	-20.4308	4.2128
	18.906	65.7612	5.422
	35.522	42.0971	18.665
	13.66	-7.9187	7.9831
	20.756	33.1877	10.341
	28.223	88.861	28.793
	4.8548	27.7595	-5.0212
	31.649	31.969	20.578
	30.809	-46.0289	24.005
	28.495	42.3369	3.0431
	23.258	35.0096	16.049
	-17.849	-20.1305	-24.421
	25.667	22.9486	10.142
	10.687	16.2791	3.8559
	-70.828	25.6162	-13.121
	16.128	63.4199	15.023
	11.558	12.0803	-5.1511
	-6.1559	-57.3266	-11.264
	-3.2075	47.6388	-14.859
	3.4558	-6.9608	-6.4696
	40.19	22.196	35.711
	20.714	34.1963	27.439
	-6.2477	2.0816	-18.034
	8.3338	7.085	1.1411
	-12.545	75.5659	-9.5546
	41.877	21.4609	30.432
	25.073	-13.6198	25.287
	83.002	52.3191	23.135
	-54.63	51.3631	-57.271
	-14.398	48.7714	-14.188
	28.041	26.8661	27.415
	14.397	29.9394	2.9175
	-4.7903	43.4807	-15.399
	-1.9776	7.4657	4.1234
	17.997	40.5803	-3.2117
	29.946	-11.9818	10.968
	30.409	74.0591	7.1845
	-0.75489	-7.9396	-20.438
	-16.386	35.1031	-11.58
	14.671	24.8677	6.882
	22.982	-86.2126	-12.074
	7.2902	-10.4727	-2.9077
	-4.7562	65.05	-9.2078
	-24.405	47.6806	-16.771
	25.117	55.6771	22.615
	19.397	63.6099	8.8368
	0.84086	-29.6657	-3.9066
	35.225	31.853	6.6871
	65.588	37.6498	84.276
	-14.899	-88.042	-14.466
	-14.658	-13.426	-11.078
	11.839	47.7925	1.5657
	-13.057	50.3005	-15.374
	21.151	-17.9134	5.8438
	18.717	42.7339	-4.0648
	-38.389	88.3661	-3.6646
	6.8681	-48.6959	-17.474
	-32.008	-38.4187	-17.517
	-32.506	-53.7286	-19.615
	43.178	68.5218	6.6452
	6.3239	37.3129	-10.402
	4.3054	-33.7649	-5.2115
	0.13316	6.2772	2.8667
	4.5523	44.5029	-10.287
	-6.4238	-32.8278	-11.049
	-41.198	26.3629	-25.129
	7.5534	-3.2676	1.3437
	-45.085	-33.5063	-15.967
	14.306	31.8189	-26.127
	3.2922	-32.3905	-30.877
	-24.029	-0.14457	-9.9165
	-10.967	87.2621	-25.909
	-17.078	85.6418	-24.178
	-45.786	-78.1756	-28.123
	43.236	-8.0036	14.219
	9.8499	54.762	1.8981
	42.861	-14.1565	-20.054
	-22.959	48.926	28.697
	9.5415	75.6011	-12.249
	-5.9176	-27.137	-22.024
	-22.472	-61.4544	-29.485
	-12.413	0.86621	-6.979
	27.791	62.3851	-10.872
	14.726	13.5797	-4.2677
	6.7777	-68.5179	-21.075
	28.93	-22.5507	3.6844
	9.1759	40.1152	-15.846
	-22.309	-6.1178	-27.873
	-18.65	-8.8546	-16.373
	32.222	21.2089	-0.39988
	1.7554	68.2951	1.8469
	5.315	-18.5556	-0.73355
	3.3448	-11.6321	-21.533
	-41.127	-11.5536	-53.199
	-3.2502	-75.576	-19.13
	13.531	29.2148	-4.0151
	-53.957	10.5145	-18.685
	-24.553	89.9369	-27.989
	-16.755	-66.5448	-19.079
	-35.023	-39.2935	-31.087
	-49.397	46.2192	-26.702
	-9.5283	-76.0953	-4.5398
	5.7585	-13.5393	-44.447
	-13.751	-83.4552	-16.764
	7.2576	-12.064	7.2156
	15.718	46.3836	-13.199
	-36.788	82.257	-13.085
	-12.724	-52.8608	-6.6504
	19.529	38.7626	-10.362
	-4.2137	29.485	-24.693
	3.5554	-32.6039	-4.2873
	-27.157	10.5431	-21.686
	6.2211	-9.9764	-19.587
	13.896	46.4475	-17.418
	14.908	0.77424	4.6058
	10.805	-21.6895	-29.497
	-49.7	33.2393	-44.679
	16.939	-60.7582	-4.2952
	28.194	53.3298	4.8436
	18.805	83.8041	-15.876
	-41.343	-84.0887	-29.546
	6.8903	-39.5045	-16.753
	10.978	-63.8489	8.8102
	4.8558	14.884	-18.348
	-55.846	80.4527	-20.125
	-18.703	-32.0432	-20.667
	1.6647	-7.4641	-15.213
	-2.7456	-1.3417	-21.078
	51.597	36.4684	79.644
	-3.8261	77.309	-37.717
	-0.61592	54.65	-18.711
	-50.816	-49.6656	-54.459
	-54.754	-13.6458	-22.993
	14.247	-10.454	-17.87
	21.824	63.5798	-67.656
	31.856	1.7043	35.694
	-76.563	-59.328	-53.464
	-33.118	84.9045	-38.975
	20.511	-19.5747	9.7283
	17.058	49.8337	-8.4119
	46.775	-49.6744	13.035
	-39.154	-21.4226	-30.251
	-29.163	18.1279	-27.188
	-22.204	2.9879	-5.2814
	-22.367	11.8075	-23.425
	-11.724	89.6894	-26.043
	4.4766	-15.4681	-12.032
	-48.911	28.1837	-25.752
	-26.827	-64.0042	-37.098
	-4.1953	-42.1047	-14.157
	-5.0359	-31.7295	18.665
	-3.2565	-77.3252	-9.1813
	10.221	-2.3842	-2.3979
	-0.32273	-85.8888	-13.903
	65.347	-52.3628	-31.267
	26.086	-38.2657	-9.3464
	-59.173	6.7766	-20.984
	-13.343	17.792	-8.2239
	-4.3191	-55.5681	-11.888
	-22.439	-84.6024	-59.536
	11.583	39.4403	-16.122
	-32.415	17.9535	-34.144
	-56.241	-2.8724	-15.004
	-27.009	-38.1958	-30.02
	-22.492	-18.2696	-25.97
	48.35	-15.539	-40.672
	25.154	-27.6816	4.7404
	9.2408	-60.1808	1.6354
	-30.551	25.4315	-20.422
	-17.047	-19.9745	-17.362
	-42.815	-61.5422	-32.627
	-74.868	71.0773	-28.16
	18.607	81.4373	-4.1742
	-41.126	31.104	-35.59
	-20.113	-26.9674	-32.612
	48.123	61.3268	-7.1985
	-14.85	2.2263	-10.779
	-31.494	-3.2464	-18.443
	19.742	52.0977	-20.118
	-7.0945	78.7862	-11.632
	-18.313	58.2201	-19.691
	-53.711	41.5535	-14.059
	78.723	-76.6044	-23.263
	-34.161	-23.2571	-38.234
	-21.02	-73.7782	-23.046
	-35.91	-72.0625	-51.545
	52.461	-71.5049	-27.95
	82.369	14.6128	-22.167
	-47.106	8.092	-34.612
	-17.343	-18.0441	-19.315
	-52.648	-25.422	72.23
	45.931	-10.3788	0.82793
	-29.043	72.5271	-34.419
	-61.537	-67.3215	-31.034
	3.3942	48.7297	-15.026
	-45.786	-32.5541	-45.152
	-30.045	-40.7149	-17.176
	62.314	12.6023	-42.691
	-17.868	41.3489	-43.332
	47.209	-6.6397	21.397
	6.6434	-44.9207	-25.973
	54.156	-8.8316	22.926
	-71.129	40.5125	-27.078
	-65.82	19.7075	-48.291
	16.217	48.4869	-8.1512
	-26.09	87.9566	-23.807
	36.357	61.398	2.621
	43.188	24.5747	10.325
	-43.56	9.4118	-39.174
	29.693	-31.0823	-30.568
	11.223	37.9396	-25.969
	-51.838	-30.6717	-4.186
	-17.153	-77.8394	-22.448
	75.832	79.5164	-46.961
	8.5543	31.4824	-3.9068
	46.759	36.2552	-17.66
	-24.711	11.0717	70.139
	34.318	-57.2858	20.354
	24.209	72.9046	-22.718
	28.143	57.6328	1.3857
	7.3635	40.6204	-9.3893
	83.034	0.33278	-63.806
	14.232	10.0708	-13.165
	17.915	2.2241	-4.2571
	-87.649	78.0445	-50.323
	0.89578	29.8186	-4.6717
	40.643	-60.6089	11.823
	3.5256	-9.4636	-6.9504
	-15.27	36.9768	-1.3996
	35.341	63.9752	20.311
	-15.195	49.5824	-27.303
	-48.829	51.6449	-13.113
	10.525	-55.6071	22.113
	-28.637	8.6074	-30.518
	-12.151	-26.1447	-21.096
	-0.30472	12.5207	-13.127
	-22.568	6.7176	-0.014995
	-29.143	-22.4621	-10.46
	84.131	29.866	-36.916
	-20.683	-15.3329	4.7993
	-9.42	-15.8416	-3.5527
	-14.441	23.01	-17.546
	-5.5048	-55.0886	-16.496
	-3.7468	16.37	-20.507
	0.46815	-36.1516	-17.087
	-11.026	30.1671	-41.388
	-0.21347	16.4744	-27.4
	5.698	56.7892	3.9188
	-3.7802	-17.4549	-46.158
	-5.7182	0.44174	-12.066
	-36.391	9.1994	-6.6607
	14.567	-64.4152	5.3804
	-34.482	60.1233	-39.424
	28.597	-62.6918	-2.8039
	-22.457	13.6771	-24.483
	-16.772	10.6113	-43.882
	22.618	-3.697	-56.124
	1.6561	87.3366	-12.216
	-11.724	-31.6443	-19.084
	-9.9466	9.3115	-24.41
	32.102	-13.6534	-0.1999
	3.0075	-77.3674	-4.4087
	-46.099	-13.1819	-30.492
	-13.327	-6.473	-9.2859
	10.281	8.1904	-14.667
	-27.142	-38.1212	-5.8226
	8.5843	-15.6382	-33.064
	-1.7583	55.038	-25.702
	33.467	-50.912	-29.306
	-59.749	14.4647	-39.097
	-4.7336	73.193	-18.178
	-19.14	-26.9889	-30.347
	-4.9763	65.6576	-33.604
	-1.2429	22.9948	-16.13
	-2.6683	-64.2386	-13.332
	-8.3484	-18.3975	-14.886
	-23.052	-39.133	-25.809
	20.8	-73.3041	-31.49
	-20.732	-85.9693	-10.23
	-69.723	11.136	-29.075
	0.26102	19.9728	-36.275
	-32.082	55.9508	-33.627
	-41.669	51.2543	-18.153
	13.509	24.4484	1.026
	57.364	7.0599	29.477
	28.217	11.357	-30.086
	2.2742	22.7791	-33.572
	81.027	-22.9042	-32.816
	-58.565	59.9795	-58.587
	45.528	-41.1139	6.3913
	-12.499	56.4872	-29.934
	-63.745	58.4838	-56.848
	66.066	-79.2742	-8.2684
	-82.111	50.213	-52.145
	22.726	16.0353	8.0571
	16.613	-49.6243	-10.295
	-22.822	65.7592	-21.129
	0.64363	45.5408	-33.533
	5.2352	80.0258	-13.704
	53.51	-29.6294	-7.5641
	15.525	-70.6845	-3.4381
	-68.929	26.5733	-41.259
	44.588	85.4224	-16.712
	60.944	88.7911	-32.24
	29.696	-6.4833	-13.997
	-85.282	33.6491	-57.703
	-85.059	86.1866	-43.588
	-69.333	46.4526	-35.178
	30.53	-18.4708	-6.5151
	-32.335	-71.2301	-66.276
	-85.727	21.0996	-14.58
	-22.766	83.3758	-36.419
	-41.886	-41.4576	-38.972
	54.176	-59.9729	-24.194
	57.356	64.4804	-3.5103
	-34.825	9.096	-23.48
	52.617	-8.4013	-6.7101
	-28.579	4.4598	-32.332
	6.1692	-0.039796	-20.836
	-29.429	-0.35811	-22.017
	-5.223	-36.2543	-23.571
	-35.879	74.2006	-33.325
	-0.86322	37.5863	-15.252
	-34.69	-5.6752	-21.874
	14.894	85.9299	-17.749
	-28.661	11.8178	4.0562
	8.4198	88.0461	-12.058
	24.468	8.5276	-12.272
	12.17	48.3419	13.231
	88.513	-1.5906	-63.048
	-58.584	25.0641	-60.279
	39.945	-13.7275	-84.485
	-47.492	74.2446	-31.982
	68.573	3.6074	30.834
	30.001	59.8651	-21.814
	-18.623	-13.641	-17.251
	11.985	15.2928	16.078
	-47.585	-39.3513	-30.855
	-17.702	15.9499	-42.591
	-52.181	-29.3811	-46.8
	25.703	8.1182	15.463
	0.3262	76.2963	-9.5889
	26.992	47.3041	-24.957
	-10.268	-45.8146	-7.9609
	1.1413	30.3949	-2.3317
	-14.466	-37.1908	-33.826
	56.473	32.6695	19.466
	6.4385	1.9086	-37.73
	-42.475	61.4311	-23.858
	17.76	-44.1588	-18.57
	59.455	4.9423	-58.655
	65.868	84.8729	-68.736
	-56.593	14.587	-65.854
	15.108	27.1955	-13.009
	51.416	11.3361	10.389
	16.631	37.7294	-34.914
	32.169	16.0235	10.507
	-16.402	32.2	-7.4708
	68.433	23.2728	-17.967
	-70.471	69.6551	-30.573
	53.47	0.47373	-34.934
	51.493	74.6123	0.24105
	-56.546	45.2739	-37.853
	35.479	52.1138	31.247
	-63.941	-27.4785	-49.38
	-21.515	-48.4474	-14.428
	-56.083	12.7523	-43.472
	-30.08	52.046	-24.921
	51.237	35.9746	13.665
	19.359	-32.7651	-76.438
	56.839	-1.5322	-9.6689
	-39.678	57.1893	-34.904
	28.006	88.9551	60.804
	-26.278	-18.0591	50.142
	-19.24	-48.749	-5.0496
	-57.027	-58.0278	-49.314
	13.482	29.6736	-13.178
	25.862	61.288	-3.3311
	-8.0739	87.3614	-4.6033
	22.678	-4.0932	-4.0503
	-31.426	-66.7976	-36.597
	35.598	50.0177	-17.025
	-3.6749	-14.2232	-36.539
	29.926	-34.1164	26.566
	11.166	-75.9471	-19.45
	51.751	-19.7933	-42.425
	39.107	-14.4968	-17.029
	-22.048	55.7207	-23.295
	-18.85	-14.1127	-30.483
	-38.774	37.3622	-13.456
	30.143	-47.1155	-10.595
	17.692	-45.583	-0.71306
	80.337	66.9226	-88.203
	61.009	-88.1238	-32.915
	12.939	61.0083	-28.829
	-13.942	56.0658	-7.1234
	27.912	47.3684	-16.7
	-47.431	43.5381	-50.099
	-43.768	66.6406	-30.381
	-72.426	-6.3187	-52.587
	-27.083	46.0014	-36.009
	12.15	-31.1848	-16.035
	26.703	-38.4135	-23.333
	74.246	-52.4943	-49.063
	7.3635	-63.0589	-30.118
	12.02	-88.2914	-16.181
	-3.8745	18.4826	21.742
	-2.6598	-42.5376	7.8853
	-27.677	-10.2783	-30.48
	-21.853	8.2534	-46.657
	-11.186	-78.4062	-27.797
	-9.6577	18.9457	-18.41
	-3.7931	-31.004	-8.9562
	-3.2546	17.9816	-14.407
	2.7908	12.1146	-1.2078
	-3.1713	-48.6488	-8.0122
	-17.244	78.3348	-28.193
	-8.5815	64.9882	-12.647
	-9.3034	82.2287	-30.376
	-24.267	30.1807	-32.027
	-30.411	56.6714	-33.116
	19.381	-14.2891	-25.256
	-15.173	84.0889	4.0952
	-21.213	28.9934	-36.856
	-4.3328	-5.6846	-19.593
	-28.698	-19.361	9.9658
	-14.568	61.243	-26.265
	-26.55	-26.6947	-21.354
	-19.893	19.5539	-24.912
	-14.913	-18.8877	-54.066
	-13.025	5.2116	-17.881
	-4.9293	-86.4639	-30.139
	-23.92	24.0417	-32.189
	-15.572	41.5479	-18.493
	-4.4459	-43.8123	-8.465
	-28.34	-22.5972	-69.33
	-23.901	13.8932	-36.057
	-37.372	-51.8051	-43.022
	-12.402	-45.2226	-1.7301
	-15.534	77.5465	-27.282
	-15.511	8.7968	-31.473
	-17.449	-16.6788	-19.047
	-3.7758	-2.8145	-12.913
	-16.997	-21.4433	-33.842
	-15.818	-24.1973	-1.9246
	-26.953	29.6557	-46.477
	-10.632	2.3512	-13.267
	-15.026	39.3243	-21.477
	11.108	0.69598	76.217
	-54.934	-11.4871	-38.24
	-13.552	36.8796	-33.285
	-25.148	18.7026	-20.183
	21.882	29.862	-36.483
	-11.323	43.8825	-24.353
	9.4968	12.3441	22.541
	19.327	36.0601	7.1454
	-33.156	83.719	-25.194
	-15.282	-30.1528	-13.565
	10.013	-4.0051	-4.9247
	34.902	45.1643	78.891
	-63.598	-44.8747	-31.339
	-8.4556	-46.667	-20.3
	-25.594	32.0909	-25.718
	29.001	12.0909	62.542
	-10.42	15.7483	-31.595
	-31.758	-7.2583	-21.294
	10.758	39.1376	5.713
	-13.542	-20.3522	3.0372
	-40.339	-67.2827	-58.36
	-22.192	81.9858	-48.139
	-50.71	-88.4397	-55.654
	74.156	-34.138	-61.829
	-36.058	-74.2955	-19.318
	-30.161	57.3789	42.197
	38.067	-55.7818	13.01
	-45.969	-18.9521	-28.005
	-63.578	4.0964	-66.475
	-52.616	-17.1376	-34.519
	-35.585	59.2525	-55.007
	-4.3604	85.7652	-48.842
	-9.5782	-37.1195	-20.213
	-36.401	-5.1945	-8.4512
	-34.269	72.7775	-31.542
	-32.222	-64.7937	-40.199
	-49.578	-6.9695	-42.269
	-46.24	30.6253	-46.27
	8.2544	-43.459	3.1542
	-18.533	-46.8114	-82.641
	-32.242	-31.5627	-13.528
	-30.926	4.9951	-13.615
	-40.143	56.4332	-37.349
	-34.542	-51.3967	-44.257
	-30.766	32.009	-77.751
	39.085	-35.8234	69.602
	-33.865	-67.1799	22.671
	-35.051	-50.0336	-46.606
	-3.9073	18.0973	-11.062
	-46.231	65.5272	-70.114
	-60.607	-48.0306	-84.409
	-71.338	-80.7428	88.701
	3.9654	-19.5457	45.926
	-19.292	47.624	-16.361
	51.579	-82.0902	49.483
	60.436	58.9547	-78.395
	-49.452	50.5977	-63.726
	-79.775	59.3761	-86.096
	-26.248	80.3234	-34.394
	-56.123	-67.2115	-17.694
	9.2164	19.1346	15.612
	46.861	73.7504	-89.629
	-9.6712	-34.2077	-14.264
	-56.724	30.0653	80.171
	-51.429	32.9908	-44.026
	-4.6435	7.6471	-35.643
	34.188	56.2381	40.387
	-21.746	65.6941	-34.794
	83.356	53.1642	67.059
	-21.77	-63.6265	-33.583
	-15.614	80.0423	-43.156
	2.3701	49.9166	-33.146
	80.013	22.775	-65.86
	-7.9302	62.069	80.139
	-49.627	40.7348	28.874
	41.694	13.5012	67.299
	49.432	64.5847	23.728
	30.44	26.3483	57.813
