# Supplementary material for: Characterisation of cell-scale signalling by the core planar polarity pathway during Drosophila wing development
Source: eLife. 2025 Dec 5;14:RP107947. doi: 10.7554/eLife.107947 (PMC12680375; doi:10.7554/eLife.107947)
Supplement: Figure 4—source data 2. [file elife-107947-fig4-data2.xlsx]

## Sheet: w-o repolarisation induction
Fig.4P-U Repolarisation condition - Cell, Stbm, Microtubule orientation
		Cell orientation	Stbm orientation	Microtubule orientation
w/o repolarisation induction
	row 0	4.6435	-10.1948	2.2123
		6.0729	6.7942	12.132
		1.9376	-79.3944	0.39332
		4.745	37.3325	-33.553
		-2.9354	-2.3632	-16.745
		8.9346	-11.0523	-13.801
		10.795	-45.2754	-13.952
		25.625	22.2361	-24.5
		16.374	20.1091	-13.211
		4.8045	25.9831	0.055976
		16.965	47.157	-17.114
		-0.3591	24.9745	-15.157
		-12.602	-35.5203	-14.839
		-10.132	-32.8605	-6.8971
		2.2361	-4.0973	-0.098782
		0.95736	63.0602	-0.45843
		2.565	-9.9171	-4.4585
		8.0662	-3.4013	-2.5987
		18.27	-8.7412	13.189
		-3.3146	5.9539	-0.32708
		-0.94291	-2.4167	12.487
		11.027	28.1239	19.614
		3.281	-21.732	2.8003
		2.9443	-72.0704	18.763
		6.6122	23.1698	0.77068
		-4.9782	-21.0873	-4.8261
		14.556	7.032	3.6279
		39.377	29.3769	-15.542
		10.689	8.8153	-13.094
		-32.122	17.0221	-25.459
		6.015	8.4046	5.0323
		-5.4986	-23.6448	9.6281
		8.3247	-34.7893	12.464
		14.101	8.6086	9.1314
		29.49	-7.2095	34.645
	row 1	-1.3436	23.984	2.2813
		4.606	7.768	-6.6009
		5.9102	25.8748	13.324
		13.939	37.2092	5.7074
		11.444	6.7392	-0.0049214
		20.632	19.3342	-17.071
		29.615	45.5775	-3.4357
		10.491	49.7522	-5.1668
		13.077	27.4919	-3.54
		21.837	10.706	-17.566
		-7.2327	41.7324	-14.116
		19.223	60.3567	3.46
		27.087	16.3067	-0.91425
		21.837	39.0465	-16.388
		-7.2327	-9.0761	-6.2127
		19.223	-18.7592	8.7573
		27.087	-3.4699	-2.7909
		-3.242	-15.4047	0.94595
		-10.31	-42.1315	-5.3711
		0.24041	3.2945	-7.185
		1.7502	6.77	-12.581
		4.2185	5.3563	1.3976
		-2.4366	28.294	21.932
		-5.8444	22.1694	2.8508
		13.369	21.9593	15.339
		0.62382	-86.2644	13.444
		3.5354	24.8758	10.068
		11.015	-2.3465	-4.4343
		16.275	-34.1647	16.792
		10.345	13.7121	-20.094
		-10.21	24.9537	-11.949
		-4.1741	14.3355	-9.8222
		-1.3436	63.8188	11.925
		4.606	-59.819	6.6145
		5.9102	-5.4043	21.178
		13.939	-18.7467	10.089
		11.444	-25.9176	16.218
	row 2	34.027	17.6071	40.162
		16.865	36.3043	16.937
		-33.55	36.1389	-39.752
		7.4758	26.6778	2.5792
		10.841	-14.8418	4.7482
		8.6516	26.3705	-12.124
		11.262	26.6451	-5.3119
		2.7807	10.2796	-6.6294
		34.721	53.0605	4.7
		13.012	17.2919	7.3542
		-4.2073	20.2184	-5.4414
		16.019	48.9235	0.2371
		-4.1659	-28.9726	-6.5422
		-13.154	-13.7558	-5.5169
		-12.097	-7.2316	-15.985
		-6.6787	-14.4051	-6.3582
		3.8032	-4.8161	0.35802
		8.2073	2.6537	5.343
		-15.518	15.8215	-9.0882
		2.9406	36.2179	-2.8748
		27.044	6.7155	46.752
		-7.0846	-34.1622	-5.6817
		-4.1156	-33.1624	5.8654
		3.5783	4.7609	8.6864
		-9.894	27.6021	-23.799
		13.087	6.4774	7.1274
		6.5345	-15.9387	2.1869
		-10.238	-13.4239	-19.674
		-9.7426	2.9015	-7.4118
		-11.434	35.4736	0.63477
		-10.473	7.8423	6.2707
		10.376	35.0225	16.345
		9.6613	27.3032	40.788
		12.589	-13.5663	15.633
	row3	-45.916	25.6238	-67.932
		44.843	47.7389	35.858
		69.763	-50.9564	46.023
		-25.49	36.1145	-34.628
		-6.0028	21.5203	-11.256
		5.1824	12.6693	-12.248
		9.6441	-67.9913	-11.52
		31.252	37.2798	-8.3717
		23.173	42.1916	9.5844
		17.824	34.4402	-2.3953
		33.994	28.9881	2.3453
		11.071	67.6087	-35.476
		0.93368	-19.5012	-2.6277
		-10.247	-35.3752	-19.351
		-3.5631	16.3583	-2.2921
		-15.929	2.816	-12.11
		-5.1239	0.15523	-2.9514
		-1.126	15.9682	2.3587
		-7.5939	-66.0201	2.8663
		-36.58	19.9672	-37.909
		-7.7205	-19.6573	-4.0859
		-15.81	65.6834	-14.343
		10.996	25.7463	20.466
		8.4101	50.0275	10.501
		-4.5331	-69.9561	1.6298
		4.7154	8.0977	3.7946
		22.256	23.5696	8.2774
		-2.9921	38.593	-6.272
		-10.533	17.9426	-21.784
		0.17911	9.7122	-5.6349
		-12.093	4.773	-9.7105
		8.4807	13.8833	23.765
		-17.054	80.9676	-3.4847
		19.085	21.9809	23.151
		25.815	14.5598	29.617
		7.8908	-55.5631	14.52
		11.069	-6.519	17.241
		1.6289	-3.2388	6.2746

## Sheet: with repolarisation induction
Fig.4P-U Repolarisation condition - Cell, Stbm, Microtubule orientation
		Cell orientation	Stbm orientation	Microtubule orientation
with repolarisation induction
	row 0	-11.696	49.4074	11.194
		-12.586	77.9551	-14.077
		-5.0629	87.3494	9.3697
		-8.7957	-67.2485	83.47
		-19.671	-43.304	-52.117
		-19.924	75.1738	-43.581
		-13.735	44.9874	17.136
		26.38	52.1681	12.767
		6.6296	51.6805	-1.5995
		13.01	38.5557	8.0357
		14.305	31.2698	1.1829
		19.212	40.1615	4.0561
		34.415	74.7032	15.88
		35.158	89.3488	16.842
		32.686	-25.6031	25.497
		14.499	-51.3647	8.169
		2.4717	27.2752	0.85405
		1.5727	67.8904	-15.747
		-0.14259	60.9203	-7.4855
		23.141	69.1678	-6.4977
		27.049	-75.3786	23.441
		6.6589	50.1467	8.2022
		-5.9663	-83.6764	8.0835
		16.19	49.9973	22.881
		-0.3908	-79.8545	4.5383
		38.164	64.1655	31.403
		25.03	63.0533	15.018
		20.009	44.0702	12.597
		6.1929	-60.9344	-9.8455
		14.315	-67.7703	1.1252
		24.557	87.3068	-12.964
		5.4372	29.4376	-9.5556
		18.4	29.5281	13.135
		-5.879	2.2593	-20.836
		8.0723	30.8154	0.12475
		19.106	80.2808	0.050494
		6.3224	-53.8467	10.909
		10.185	-25.632	-14.755
		5.0374	-67.1218	-11.661
		4.2392	56.6971	-3.1627
		12.855	46.4661	3.616
		-7.7507	63.0574	0.57945
		8.9094	80.9996	-16.906
		-8.3394	-85.0742	-21.697
		10.373	58.7023	1.6322
		-8.9329	84.4699	-6.5793
		-2.9427	-64.73	-5.418
		83.305	-71.948	-2.3074
		-19.85	11.0824	-2.0435
		1.7487	-82.9872	-3.5481
		11.037	24.8653	3.5495
	row 1	-71.487	62.5805	59.519
		-39.238	74.3853	23.791
		-11.143	75.7853	64.799
		1.4278	20.3691	12.419
		-1.5836	36.8768	-3.9988
		20.607	24.0526	6.2422
		15.085	1.2681	1.0722
		-0.40162	46.9602	-25.791
		14.418	46.8993	0.36726
		24.336	77.9933	22.691
		42.026	8.1345	-70.497
		27.171	28.0256	0.77179
		16.85	-86.2238	1.8091
		17.82	-72.9455	-14.411
		5.3278	87.9651	-7.6735
		8.5991	-81.2534	-13.553
		-47.637	-72.7048	12.821
		-22.63	2.694	-12.462
		13.098	78.5224	14.232
		47.52	57.4904	26.021
		-2.5926	-79.5407	-2.8255
		53.709	68.1544	52.848
		21.409	54.7103	22.941
		21.797	-46.4836	9.2081
		27.557	-42.6374	18.019
		15.432	50.9428	8.2091
		12.838	60.8385	-6.7835
		6.2273	75.1713	-0.0032398
		24.536	87.3768	-12.965
		5.4372	29.2215	-9.5556
		6.3278	8.7374	-9.2844
		-0.27845	51.9587	-27.828
		20.315	30.947	8.3503
		4.7645	36.3399	-2.6338
		-5.7765	18.4536	1.2974
		9.5278	19.3294	5.9309
		-1.8873	69.1335	-9.6546
		0.086717	35.5723	7.5373
		12.094	31.9111	-18.605
		-2.0279	72.842	-9.7516
		-4.5485	79.7773	-3.9011
		-10.09	57.9315	-9.3456
		26.495	64.5452	17.437
		-31.108	-55.7581	10.806
		-4.1874	74.3133	24.637
		38.619	50.0272	18.872
		5.701	62.0052	0.14241
		-8.9376	-19.2661	-4.9357
	row 2	-34.748	34.108	-61.037
		-16.073	3.9829	-18.772
		-36.645	11.0234	-38.383
		-14.539	52.0389	7.2101
		55.695	66.8003	43.243
		23.04	40.7203	2.7633
		7.473	17.3156	3.0663
		21.974	18.3549	2.2732
		7.117	22.6239	-3.087
		9.899	72.9955	1.1388
		21.23	53.5701	2.5822
		20.878	26.3441	-2.3459
		-16.885	89.1419	-3.8568
		17.278	28.4572	0.72825
		19.666	23.1769	4.0195
		13.046	-2.5601	33.867
		-66.586	30.4819	-12.798
		12.894	24.7905	18.752
		-3.7596	28.6597	31.988
		-9.1325	34.9485	11.847
		15.659	40.8331	17.178
		48.565	69.9089	26.573
		-59.771	-9.3164	35.992
		15.377	6.1828	16.759
		36.03	15.9354	15.771
		24.146	61.5837	9.3347
		21.394	51.3945	7.2631
		1.69	22.611	-14.463
		8.7238	32.1232	9.4421
		22.394	26.7442	30.437
		14.568	25.463	-2.0551
		16.448	35.7974	1.9415
		16.798	35.7809	-12.915
		-24.752	84.424	-20.984
		-7.9025	8.2712	-9.9751
		-5.5432	-86.7913	-14.58
		0.39691	38.4718	-5.8861
		-22.662	-1.8969	-5.1387
		20.606	46.1863	18.62
		26.471	31.6884	18.505
		-5.9121	51.0415	4.6538
		75.636	49.2837	-4.5643
		43.445	62.4668	13.226
		-12.066	33.9405	15.126
		41.852	43.7318	30.604
		-26.525	-1.0321	3.4999
	row3	-7.3309	31.1549	-63.741
		-31.496	-3.8546	2.7354
		-40.121	25.7871	-54.362
		-57.779	20.186	67.39
		38.174	25.7847	61.179
		15.33	-84.4166	73.682
		21.932	38.3914	3.8447
		33.748	8.2133	17.197
		49.999	40.0389	-0.032439
		3.7263	45.0491	6.2289
		11.472	-8.6417	17.109
		12.96	40.0391	-11.295
		8.4428	17.9918	-1.6977
		33.567	34.1253	11.681
		44.043	38.0953	56.139
		-37.379	18.4925	38.324
		10.114	0.90116	8.3859
		-3.3193	12.6976	2.0277
		-6.1427	24.6331	32.578
		39.846	31.4644	24.986
		-57.963	61.4567	-82.576
		8.3899	-7.1323	45.316
		-17.01	19.2697	20.104
		-73.196	5.7041	-84.545
		21.684	24.1656	17.521
		30.34	20.963	25.824
		28.014	-19.037	10.296
		-1.4104	-9.99	1.7821
		15.658	18.3041	-8.2449
		38.15	53.0473	5.0517
		26.277	39.0476	20.403
		16.484	25.9745	18.938
		15.567	18.5162	13.954
		14.284	56.1912	21.047
		3.1053	-3.1934	24.303
		-11.058	7.3788	-17.701
		-9.5479	2.9695	-11.505
		-4.3521	18.4158	-35.866
		-38.412	18.5549	-55.79
		-12.28	34.4973	-42.419
		0.76478	67.6809	0.82906
		-9.0696	2.4853	-9.9705
		-1.9446	-2.0129	3.6078
		-11.24	-15.4022	-11.149
		5.9841	-11.3331	18.365
		-23.712	34.4331	5.9067
