# Supplementary material for: Characterisation of cell-scale signalling by the core planar polarity pathway during Drosophila wing development
Source: eLife. 2025 Dec 5;14:RP107947. doi: 10.7554/eLife.107947 (PMC12680375; doi:10.7554/eLife.107947)
Supplement: Figure 5—figure supplement 1—source data 1. [file elife-107947-fig5-figsupp1-data1.xlsx]

## Sheet: Fz orientation
Fig.5_S1E De novo condition - Fz orientation 6-8-10h
	Fz orientation
de novo condition - 6h	-49.3576
	-18.3852
	-11.461
	17.1171
	4.1614
	45.163
	-1.8018
	-28.0954
	-78.1735
	-13.0779
	0.89509
	-10.2683
	-23.6283
	-13.039
	18.5856
	-44.889
	-13.6462
	-42.226
	68.1523
	-21.5141
	-35.1413
	-3.2898
	-21.9622
	26.1299
	-18.6508
	-0.79252
	-16.0232
	-7.7309
	-77.8828
	72.7562
	-89.8778
	-14.3919
	-27.9537
	-42.9253
	-39.4355
	9.205
	-51.3686
	-29.3667
	83.5265
	-28.1889
	79.1049
	2.4303
	-56.8458
	16.2452
	-45.1724
	-30.8242
	-5.521
	-0.26419
	-13.3146
	-5.0373
	4.3463
	23.0978
	-14.7772
	29.5756
	-29.7804
	-12.5355
	-5.9271
	19.4872
	32.1047
	-34.8998
	-17.029
	8.0794
	-5.8686
	37.671
	-57.8082
	-30.7106
	-20.8586
	-3.4065
	-9.9175
	13.9041
	-11.2353
	-1.8238
	-79.7915
	-11.3521
	-11.165
	13.2527
	-6.8004
	15.616
	-29.0228
	16.2435
	4.4845
	-17.8177
	46.9566
	-9.4947
	-3.6279
	-12.0021
	-17.0072
	-2.3649
	-20.9393
	-2.0435
	-14.0083
	-17.8285
	13.8191
	-29.498
	1.7305
	-5.2328
	-15.0801
	63.1368
	-23.4487
	-3.9235
	-1.8005
	-11.0789
	9.7604
	-9.1829
	-18.799
	-11.8889
	8.0643
	-15.9603
	-17.4903
	7.2773
	-17.1622
	16.3819
	2.3664
	73.3943
	-17.9864
	-15.6822
	15.9002
	67.8824
	-81.3048
	-22.7877
	5.5242
	5.3032
	-45.7815
	13.8342
	2.6201
	-17.6514
	27.0825
	-26.5347
	-3.9108
	8.7653
	-1.518
	5.2711
	4.4428
	-55.777
	75.4779
	14.1556
	16.3702
	30.7544
	-17.2068
	8.8349
	-5.5601
	80.567
	-9.6721
	-7.1414
	-1.8138
	9.5277
	71.4063
	23.7496
	-2.3548
	83.9784
	-23.7435
	-51.7785
	-55.1337
	-44.6072
	34.1971
	-60.0543
	25.2884
	70.1828
	-10.7224
	56.7116
	-1.4584
	-20.3414
	-21.216
	19.0971
	-14.214
	-7.6261
	16.0778
	50.4485
	-39.9523
	14.6405
	15.6292
	18.7719
de novo condition - 8h	-28.5038
	-34.8233
	-7.1804
	-51.7513
	-36.3734
	-54.655
	-48.9652
	11.7709
	-44.038
	3.2559
	-26.9383
	61.639
	-23.7439
	10.9206
	5.6345
	-5.2849
	-15.0642
	-10.1108
	29.728
	-4.81
	-27.0487
	-18.3486
	-17.9156
	-6.2295
	11.0417
	0.099487
	-10.8185
	-4.7983
	3.4221
	-10.0592
	12.7328
	84.3921
	-5.8716
	-10.1446
	7.9389
	1.7022
	-0.52311
	4.5165
	-0.7833
	-2.2278
	19.8633
	-16.499
	12.8328
	-15.902
	-16.2802
	-3.7465
	9.672
	-8.9012
	-10.1249
	-13.82
	-13.7652
	-11.76
	14.369
	-1.9661
	22.2928
	15.7514
	11.5315
	-24.5439
	18.2611
	-22.9516
	-73.2334
	-9.0861
	6.1344
	12.5289
	60.998
	14.6544
	-10.2657
	-8.7929
	20.0972
	-5.2644
	-17.731
	15.9086
	-26.0291
	-8.2137
	-13.3119
	-80.7117
	-4.4606
	-4.0766
	34.8025
	-1.0474
	0.57465
	-86.2326
	0.41471
	-70.1109
	-20.8367
	-72.059
	39.3001
	-30.5198
	49.3332
	59.4902
	-16.0574
	7.7454
	66.7645
	66.4256
	-12.9347
	13.7334
	70.6076
	24.2867
	-11.3597
	-2.7024
	18.0988
	12.8077
	1.0001
	3.3975
	14.9096
	13.4993
	14.6891
	26.6715
	4.5641
	11.269
	-6.3142
	7.6798
	-6.0583
	23.7286
	-31.8534
	23.0993
	-14.4396
	-3.7568
	-1.3857
	9.9902
	-8.7659
	2.6862
	14.0545
	4.7277
	-11.8085
	58.3473
	4.4044
de novo condition - 10h	-16.1042
	-27.4272
	45.3935
	-37.8247
	-82.6333
	63.8895
	-13.827
	-16.3503
	-48.9269
	-23.6106
	-43.6094
	0.14382
	-10.8761
	-57.186
	-89.5918
	7.2557
	-34.2415
	-41.9431
	-51.3347
	-54.8758
	62.4137
	29.1429
	-20.7426
	-40.1899
	6.767
	-36.7316
	-73.6416
	-11.3881
	1.5861
	-39.8963
	27.8117
	-11.1545
	-17.9275
	-25.3595
	23.1739
	-26.6631
	5.4702
	56.4719
	35.01
	21.5646
	-24.9812
	-45.3994
	-33.9115
	14.5898
	-26.9739
	10.5013
	-5.4137
	4.4383
	10.2627
	-11.0709
	-5.5841
	8.1849
	-22.5195
	-25.2111
	-24.6428
	-18.3026
	-38.3786
	-34.3962
	-31.8576
	1.9434
	-16.234
	-28.1914
	6.667
	6.166
	-24.0007
	-21.1618
	8.8085
	8.9373
	0.68535
	7.3673
	15.3679
	-19.1945
	45.7442
	26.6428
	-29.0508
	-6.0958
	1.5839
	6.8744
	33.9999
	56.2828
	-5.9267
	-19.3689
	6.5938
	13.9699
	4.1864
	-41.305
	43.1899
	33.0607
	-0.39353
	2.0064
	5.48
	-59.7026
	38.2184
	-14.0852
	-22.2342
	24.985
	37.3148
	1.2789
	24.9647
	-22.8058
	9.7294
	-18.213
	-23.6644
	-40.1011
	-85.7792
	-67.4739
	-25.8454
	-9.4078
	-73.0779
	42.1807
	-23.9031
	65.6216
	-12.6046
	24.2847
	8.8004
	28.8937
	-8.9399
	-30.1688
	-4.2335
	-1.3359
	-9.0636
	-16.537
	-17.6498
	-10.9705
	6.6469
	15.2449
	-4.8318
	-20.5323
	-20.2702
	7.5976
	78.1001
	-0.32426
	-30.0791
	5.3812
	-22.0024
	68.5987
	7.0721
	-13.1288
	-60.7816
	-14.1984
	21.8065
	21.7771
	-37.1101
	14.3857
	37.2892
	-18.9869
	13.4382
	-27.9388
	-3.909
	-33.2782
	-5.4273
	17.7785
	-15.3214
	20.1636
	-4.6251
	-2.7108
	0.8532
	-0.12077
	35.0514
	-29.9101
	1.4167
	-13.024
	-4.6443
	4.1349
	2.2831
	-21.6164
	12.7126
	4.9735
	-27.6647
	-9.0031
	-35.5205
control condition	-28.8814
	-10.2605
	-10.1253
	34.0336
	-29.672
	31.8957
	-26.9807
	19.0232
	17.1871
	-6.972
	-0.21097
	5.1299
	0.98871
	-35.5553
	-15.4266
	-3.1173
	-12.2393
	-7.8923
	-18.7869
	-28.8173
	-22.9402
	-9.7749
	-26.3741
	-16.4617
	-23.8042
	5.1087
	-10.6078
	-13.534
	-0.72261
	-4.0896
	-12.4839
	9.2609
	29.5833
	80.2215
	-20.6763
	-13.9445
	-12.0881
	-29.5134
	3.951
	0.84946
	-17.9718
	13.0447
	27.8035
	-3.1478
	-1.4307
	-3.34
	-6.5463
	-33.6246
	-24.9879
	17.4204
	-40.1183
	-12.8229
	-32.7526
	-14.2185
	-5.0375
	-23.0301
	-38.619
	3.7417
	-24.4881
	-28.6729
	-39.7257
	-2.5843
	51.9131
	-62.4416
	-5.9302
	5.4473
	44.8011
	20.4843
	9.0056
	-12.1812
	3.6424
	17.9164
	82.7335
	2.5446
	-28.1168
	-2.5754
	-9.7641
	-17.5105
	-63.9999
	-1.7056
	-20.8421
	-17.5413
	-28.685
	-48.1852
	-29.9951
	-22.5723
	3.2694
	-40.1691
	-20.5431
	78.086
	-21.4504
	-12.9719
	10.6857
	-6.7501
	3.4946
	-42.5271
	17.1005
	-17.4755
	-58.539
	-36.8936
	-40.4219
	-26.4595
	-16.379
	-9.4511
	-11.1004
	-24.0168
	1.7659
	-24.841
	-75.7301
	-15.4835
	-11.8044
	-24.5256
	-33.2649
	-1.5136
	-22.1424
	-4.9436
	3.4802
	-1.2919
	-9.6637
	-8.3952
	-12.2982
	-1.8931
	-21.5432
	-19.4856
	-2.4058
	-10.4657
	-4.136
	-9.3184
	-9.4297
	0.54187
	-11.0556
	-16.1106
	-6.1468
	-49.6757
	-35.9427
	-25.5985
	-4.5234
	-25.6232
	3.6129
	-24.0918
	-8.1028
	-16.2128
	-2.7848
	6.5524
	-9.823
	-9.5915
	5.7659
	10.0482
	8.0335
	-9.9871
	32.3005
	11.1921
	16.9781
	22.5981
	25.3826
	15.0406
	14.9113
	25.847
	40.2375
	-14.6172
	-5.0693
	-4.4353
	-2.5626
	-17.875
	-5.9084
	-11.2329
	-3.0759
	-7.9774
	-8.6045
	-16.4959
	-30.5413
	-9.5289
	-2.022
	2.556
	-29.6553
