# Supplementary material for: Characterisation of cell-scale signalling by the core planar polarity pathway during Drosophila wing development
Source: eLife. 2025 Dec 5;14:RP107947. doi: 10.7554/eLife.107947 (PMC12680375; doi:10.7554/eLife.107947)
Supplement: Figure 5—source data 1. [file elife-107947-fig5-data1.xlsx]

## Sheet: de novo condition
Fig.5I-L Fz-sfGFP polarity
		Polarity angle	Polarity magnitude
de novo condition
	row 0	61.8894	0.12474
		42.5082	0.19203
		79.4579	0.16243
		13.7976	0.1717
		8.92463	0.14894
		30.6613	0.1756
		18.4737	0.098688
		21.5286	0.13458
	row 1	71.0509	0.19955
		19.7362	0.15721
		89.2884	0.15718
		60.0442	0.15001
		23.5342	0.13399
		24.4086	0.13124
		47.8903	0.11412
		11.1737	0.10601
	row 2	53.2948	0.12497
		30.6956	0.20371
		-11.036	0.092093
		11.1464	0.15608
		26.7455	0.10543
		29.1451	0.18886
		10.8618	0.18731
		33.1917	0.11787
	row3	-13.6608	0.14724
		19.5891	0.17926
		16.3771	0.15684
		25.7317	0.19844
		23.4945	0.15135
		20.6211	0.20153
		26.4761	0.14467
		30.5685	0.18157

## Sheet: control condition
Fig.5I-L Fz-sfGFP polarity
		Polarity angle	Polarity magnitude
control condition
	row 0	30.3849	0.17249
		5.46638	0.18068
		36.1283	0.18359
		36.38	0.054404
		31.3053	0.13595
		18.7018	0.092706
		49.844	0.12551
		6.71602	0.14098
	row 1	36.4408	0.23755
		36.0638	0.20452
		38.5108	0.15682
		17.9614	0.10572
		33.4664	0.10667
		-11.215	0.14675
		54.9421	0.16623
		1.37663	0.16676
	row 2	21.4803	0.21099
		9.29792	0.2033
		1.99363	0.16189
		1.83908	0.11198
		8.12202	0.14491
		83.9196	0.070984
		34.169	0.17194
		-22.3125	0.20212
	row3	20.2738	0.16765
		21.5314	0.22246
		23.9409	0.086292
		1.32022	0.12214
		2.65025	0.17714
		3.70512	0.1122
		13.4743	0.19521
		-12.6956	0.12249

## Sheet: repolarisation condition
Fig.5I-L Fz-sfGFP polarity
		Polarity angle	Polarity magnitude
repolarisation condition
	row 0	44.776	0.1595
		100.725	0.33521
		95.1997	0.30761
		79.2769	0.36435
		60.5095	0.28086
	row 1	1.44113	0.17344
		38.3538	0.19108
		30.0155	0.18899
		70.159	0.24409
		56.8533	0.20122
	row 2	23.466	0.21059
		20.353	0.24085
		22.2486	0.20754
		3.91303	0.1777
		23.8591	0.16108
	row3	36.0225	0.17985
		49.0722	0.17052
		33.1814	0.19213
		23.7557	0.14687
		39.5143	0.17685

## Sheet: repolarisation in de novo
Fig.5I-L Fz-sfGFP polarity
		Polarity angle	Polarity magnitude
repolarisation in de novo condition
	row 0	38.7074	0.25302
		52.9579	0.18951
		43.7947	0.23762
		51.2035	0.19271
		99.6231	0.32219
		89.6683	0.26108
		56.0572	0.30188
		87.5284	0.33158
		50.5659	0.23267
		41.9919	0.20339
	row 1	35.2605	0.33662
		9.14406	0.19946
		-8.69347	0.13995
		34.6939	0.19894
		52.5738	0.24702
		39.0397	0.27963
		40.7706	0.19612
		75.35	0.21756
		36.7059	0.24287
		42.853	0.19689
	row 2	46.9883	0.17146
		23.3609	0.21618
		12.6546	0.090279
		30.9806	0.19213
		52.9313	0.23125
		44.2349	0.25921
		66.5009	0.15117
		6.43285	0.18563
		25.6175	0.15655
		25.5415	0.15488
	row3	14.3137	0.13328
		27.0247	0.14439
		33.1805	0.10029
		25.4273	0.15977
		62.3955	0.14242
		46.2216	0.2095
		50.6015	0.20042
		60.2372	0.19512
		33.4182	0.15455
		36.2853	0.21287
