# Supplementary material for: Characterisation of cell-scale signalling by the core planar polarity pathway during Drosophila wing development
Source: eLife. 2025 Dec 5;14:RP107947. doi: 10.7554/eLife.107947 (PMC12680375; doi:10.7554/eLife.107947)
Supplement: Figure 6—figure supplement 1—source data 1. [file elife-107947-fig6-figsupp1-data1.xlsx]

## Sheet: repolarisation condition 6h
Fig.6_S1 Fz intensity on junctions in repolarisation & repolarisation in de novo condition - 6-10h
Repolarisation condition - 6h		Fz intensity on medio-lateral junctions
Medio-lateral junctions
	row 0	241.671
		158.306
		115.704
		239.308
		267.454
	row 1	359.557
		398.74
		361.691
		249.617
		226.051
	row 2	328.502
		474.649
		467.26
		515.341
		385.89
	row 3	428.303
		299.303
		258.514
		317.821
		335.682
Repolarisation condition - 6h		Fz intensity on horizontal junctions
Horizontal junctions
	boundary 0	171.225
		112.612
		173.51
		195.041
		128.714
	boundary 1	522.939
		802.571
		514.531
		346.612
	boundary 2	94
		517.796
		565.531
		146.163
		438.082
	boundary 3	211.245
		242.306
		122.041
		751.184
		196.327
	boundary 4	250.204
		205.102
		196.673
		265.602
		270.857

## Sheet: repolarisation condition 10h
Fig.6_S1 Fz intensity on junctions in repolarisation & repolarisation in de novo condition - 6-10h
Repolarisation condition - 10h		Fz intensity on medio-lateral junctions
Medio-lateral junctions
	row 0	202.676
		380.653
		267.033
		236.2
		275.259
		246.762
		297.518
	row 1	269.133
		423.233
		507.851
		276.864
		424.534
		392.559
		489.426
	row 2	329.533
		497.688
		461.272
		325.551
		470.52
		429.147
		510.324
	row 3	309.032
		493.076
		467.391
		386.721
		433.122
		633.26
		421.279
Repolarisation condition - 10h		Fz intensity on horizontal junctions
Horizontal junctions
	boundary 0	170.653
		170.245
		188.925
		173.612
		163.041
		259.122
		177.296
	boundary 1	334.143
		821.857
		417.949
		654.122
		859.939
		187.347
		415.816
	boundary 2	189.571
		396.02
		168.531
		270.551
		112.326
		278.02
		406.918
	boundary 3	445
		559.959
		341.796
		432.122
		313.367
		761.082
		542.469
	boundary 4	154.469
		299.592
		619
		456.592
		633.898
		539.898
		227.143

## Sheet: repolarisation in de novo 6h
Fig.6_S1 Fz intensity on junctions in repolarisation & repolarisation in de novo condition - 6-10h
Repolarisation in de novo condition - 6h		Fz intensity on medio-lateral junctions
Medio-lateral junctions
	row 0	227.569
		222.139
		157.122
		185.831
		140.331
		120.775
		178.109
		264.172
		266.978
		326.943
	row 1	204.184
		474.603
		158.682
		424.054
		308.759
		307.13
		234.962
		242.884
		250.865
		366.488
	row 2	257.12
		337.554
		160.236
		404.854
		514.909
		434.663
		310.481
		495.978
		327.384
		362.257
	row 3	246.111
		322.334
		159.367
		308.006
		309.687
		271.656
		294.078
		374.155
		418.544
		370.48
Repolarisation in de novo condition - 6h		Fz intensity on horizontal junctions
Horizontal junctions
	boundary 0	198.755
		114.878
		154.429
		239.143
		160.959
		168.245
		187.98
		494.776
		166.918
		105.326
	boundary 1	177.327
		327.163
		142.184
		274.327
		428.694
		283.551
		158.102
		655.582
		194.347
		211.306
	boundary 2	306.449
		278.122
		110.225
		431.204
		819.735
		791.429
		258.041
		427.898
		169.898
		457.041
	boundary 3	117.204
		271.102
		132.122
		257.02
		880.225
		360.224
		382.49
		461.908
		194.204
		464.878
	boundary 4	93.7143
		327.878
		118.245
		170.51
		159.041
		562.061
		397.694
		412.663
		367.286
		483.653

## Sheet: repolarisation in de novo 10h
Fig.6_S1 Fz intensity on junctions in repolarisation & repolarisation in de novo condition - 6-10h
Repolarisation in de novo condition - 10h		Fz intensity on medio-lateral junctions
Medio-lateral junctions
	row 0	215.867
		223.036
		156.195
		233.469
		131.017
		112.507
		159.329
	row 1	345.639
		327.669
		317.173
		309.401
		257.393
		288.309
		248.85
	row 2	301.738
		446.641
		349.237
		396.111
		214.671
		381.493
		196.441
	row 3	426.446
		295.954
		254.52
		340.012
		312.298
		212.79
		280.446
Repolarisation in de novo condition - 10h		Fz intensity on horizontal junctions
Horizontal junctions
	boundary 0	122.347
		360.755
		159.327
		127.939
		145.571
		127.898
		160.796
	boundary 1	884.061
		163.061
		207.122
		547.633
		253.245
		130.367
		173.265
	boundary 2	516.878
		153.939
		256.061
		696.306
		227.735
		107.939
		263.694
	boundary 3	686.918
		331.163
		574.878
		540.449
		102.306
		330.49
		210.98
	boundary 4	281.653
		191.592
		760.735
		164.694
		404.939
		258.959
		285.98
