# Supplementary material for: Characterisation of cell-scale signalling by the core planar polarity pathway during Drosophila wing development
Source: eLife. 2025 Dec 5;14:RP107947. doi: 10.7554/eLife.107947 (PMC12680375; doi:10.7554/eLife.107947)
Supplement: Figure 6—source data 1. [file elife-107947-fig6-data1.xlsx]

## Sheet: control condition
Fig.6 Fz intensity on junctions in repolarisation & repolarisation in de novo condition
Control condition		Fz intensity on medio-lateral junctions
Medio-lateral junctions
	row 0	458.638
		611.929
		394.037
		191.153
		242.464
		305.006
		543.313
		248.401
	row 1	442.671
		531.761
		286.071
		199.194
		287.003
		318.849
		333.357
		439.065
	row 2	588.465
		795.195
		328.543
		254.306
		363.606
		271.554
		517.617
		414.041
	row 3	471.992
		522.487
		258.527
		263.837
		353.18
		257.539
		447.069
		445.724
Control condition		Fz intensity on horizontal junctions
Horizontal junctions
	boundary 0	317.755
		218.935
		235.367
		113.245
		182.714
		114.816
		177.469
		186.122
	boundary 1	363.51
		219.714
		181.082
		136.225
		171.082
		229.918
		170.898
		231.816
	boundary 2	331.347
		500.735
		251.98
		112.429
		194.102
		143.531
		404.735
		217.98
	boundary 3	209.571
		253.551
		288.388
		292.776
		164.163
		166.51
		198.408
		271.633
	boundary 4	175
		255.449
		176.694
		159.163
		132.714
		123
		359
		249.367

## Sheet: repolarisation condition
Fig.6 Fz intensity on junctions in repolarisation & repolarisation in de novo condition
Repolarisation condition		Fz intensity on medio-lateral junctions
Medio-lateral junctions
	row 0	241.671
		158.306
		115.704
		239.308
		267.454
	row 1	359.557
		398.74
		361.691
		249.617
		226.051
	row 2	328.502
		474.649
		467.26
		515.341
		385.89
	row 3	428.303
		299.303
		258.514
		317.821
		335.682
Repolarisation condition		Fz intensity on horizontal junctions
Horizontal junctions
	boundary 0	171.225
		112.612
		173.51
		195.041
		128.714
	boundary 1	522.939
		802.571
		514.531
		346.612
	boundary 2	94
		517.796
		565.531
		146.163
		438.082
	boundary 3	211.245
		242.306
		122.041
		751.184
		196.327
	boundary 4	250.204
		205.102
		196.673
		265.602
		270.857

## Sheet: repolarisation in de novo
Fig.6 Fz intensity on junctions in repolarisation & repolarisation in de novo condition
Repolarisation in de novo condition		Fz intensity on medio-lateral junctions
Medio-lateral junctions
	row 0	227.569
		222.139
		157.122
		185.831
		140.331
		120.775
		178.109
		264.172
		266.978
		326.943
	row 1	204.184
		474.603
		158.682
		424.054
		308.759
		307.13
		234.962
		242.884
		250.865
		366.488
	row 2	257.12
		337.554
		160.236
		404.854
		514.909
		434.663
		310.481
		495.978
		327.384
		362.257
	row 3	246.111
		322.334
		159.367
		308.006
		309.687
		271.656
		294.078
		374.155
		418.544
		370.48
Repolarisation in de novo condition		Fz intensity on horizontal junctions
Horizontal junctions
	boundary 0	198.755
		114.878
		154.429
		239.143
		160.959
		168.245
		187.98
		494.776
		166.918
		105.326
	boundary 1	177.327
		327.163
		142.184
		274.327
		428.694
		283.551
		158.102
		655.582
		194.347
		211.306
	boundary 2	306.449
		278.122
		110.225
		431.204
		819.735
		791.429
		258.041
		427.898
		169.898
		457.041
	boundary 3	117.204
		271.102
		132.122
		257.02
		880.225
		360.224
		382.49
		461.908
		194.204
		464.878
	boundary 4	93.7143
		327.878
		118.245
		170.51
		159.041
		562.061
		397.694
		412.663
		367.286
		483.653
