# Supplementary material for: Characterisation of cell-scale signalling by the core planar polarity pathway during Drosophila wing development
Source: eLife. 2025 Dec 5;14:RP107947. doi: 10.7554/eLife.107947 (PMC12680375; doi:10.7554/eLife.107947)
Supplement: Supplementary file 1. — Excel file listing genotypes of Drosophila strains used for each experiment. [file elife-107947-supp1.xlsx]

## Sheet: Feuil1
Supplemental File 1. Genotypes used in each experiment
Figure	Simplified genotype	Complete genotype	Comment
Figure 2	dsh de novo	w dsh1 hsFLP/y;; Act>>fz-mKate2sfGFP, fzP21/fzP21	male only
	de novo	w;; hsFLP, fzP21/Act>>fz-mKate2sfGFP, fzP21
	control	w;; Act-fz-mKate2sfGFP, fzP21/fzP21
Figure 3	In de novo condition (A-G, H,J)
	control	w;; hsFLP1, fzP21/Act>>fz-mKate2sfGFP, fzP21
	dgo/+	w; FRT42 dgo380/+; Act>>fz-mKate2sfGFP, fzP21/ hsFLP, fzP21
	pk/+	w; pkpk-sple13/+; Act>>fzmKate2sfGFP, fzP21/fzP21
	dsh/+	w dsh1 hsFLP/+;; Act>>fz-mKate2sfGFP, fzP21/fzP21
	dsh/dsh	w dsh1 hsFLP/y;; Act>>fz-mKate2sfGFP, fzP21/fzP21	male only
	stbm/+	w; stbm6/+; Act>>fz-mKate2sfGFP, fzP21/hsFLP, fzP21
	fmi/+	w; fmiE59/+; Act>>fz-mKate2sfGFP, fzP21/hsFLP, fzP21
	In control condition (I,K)
	control	w;; Act-fz-mKate2sfGFP, fzP21/fzP21
	dgo/+	w; FRT42 dgo380/+; Act-fzmKate2sfGFP fzP21/ fzP21
	pk/+	w; pkpk-sple13/+; Act-fzmKate2sfGFP, fzP21/fzP21
	dsh/+	w1118 dsh1/+;; Act-fz-mKate2sfGFP, fzP21/fzP21
	dsh/dsh	w1118 dsh1/y;; Act-fz-mKate2sfGFP, fzP21/fzP21	male only
	stbm/+	w; stbm6/+; Act-fz-mKate2sfGFP, fzP21/fzP21
	fmi/+	w; fmiE59/+; Act-fz-mKate2sfGFP, fzP21/fzP21
Figure 4	wild-type	w1118	with heat shock
	w/o de novo induction	w; Act>>fz-eYFP/+; fzP21/fzP21	with heat shock
	with de novo induction	w hsFLP/+; Act>>fz-eYFP/+; fzP21 FRT80/fzP21	with heat shock
	w/o repolarisation induction	w;; hh-Gal4/UAS>>Fz [NL]	with heat shock
	with repolarisation induction	w hsFLP/+;; hh-Gal4/UAS>>Fz [NL]	with heat shock
Figure 5	control	y w hsFLP/+;; UAS>>fz[NL], Act-fz-mKate2sfGFP, fzP21/hh-Gal4, fzP21	without heat shock
	de novo	w;; hsFLP, fzP21/Act>>fz-mKate2sfGFP, fzP21	with heat shock
	repolarisation	y w hsFLP/+;; UAS>>fz[NL], Act-fz-mKate2sfGFP, fzP21/hh-Gal4, fzP21	with heat shock
	repolarisation in de novo	y w hsFLP/+;; UAS>>fz[NL], Act>>fz-mKate2sfGFP, fzP21/hh-Gal4, fzP21	with heat shock
Figure 6	control	y w hsFLP/+;; UAS>>fz[NL], Act-fz-mKate2sfGFP, fzP21/hh-Gal4, fzP21	without heat shock
	repolarisation	y w hsFLP/+;; UAS>>fz[NL], Act-fz-mKate2sfGFP, fzP21/hh-Gal4, fzP21	with heat shock
	repolarisation in de novo	y w hsFLP/+;; UAS>>fz[NL], Act>>fz-mKate2sfGFP, fzP21/hh-Gal4, fzP21	with heat shock
Sup. Fig.1	(C-D)
	wt	w1118
	de novo (induction)	w;; hsFLP, fzP21/Act>>fz-mKate2sfGFP, fzP21	with heat shock
	constitutive	w;; Act-fz-mKate2sfGFP, fzP21/fzP21
Sup. Fig.2	wt	w1118
	pk-sple13/+	w; pkpk-sple13/+
	fmiE59/+	w; fmiE59/+
	EGFP-dgo	w; P[acman]-EGFP-Dgo FRT42 dgo380
	EGFP-dgo/dgo380	w;P[acman]-EGFP-Dgo FRT42 dgo380/FRT42 dgo380
Sup. Fig.3	In control condition (A-G)
	control	w;; Act-fz-mKate2sfGFP, fzP21/fzP21
	dgo/+	w; FRT42 dgo380/+; Act-fzmKate2sfGFP fzP21/ fzP21
	pk/+	w; pkpk-sple13/+; Act-fzmKate2sfGFP, fzP21/fzP21
	dsh/+	w1118dsh1/+;; Act-fz-mKate2sfGFP, fzP21/fzP21
	dsh/dsh	w1118 dsh1/y;; Act-fz-mKate2sfGFP, fzP21/fzP21	male only
	stbm/+	w; stbm6/+; Act-fz-mKate2sfGFP, fzP21/fzP21
	fmi/+	w; fmiE59/+; Act-fz-mKate2sfGFP, fzP21/fzP21
	In de novo condition (H,I)
	control	w;; hsFLP1, fzP21/Act>>fz-mKate2sfGFP, fzP21	with heat shock
	dgo/+	w; FRT42 dgo380/+; Act>>fz-mKate2sfGFP, fzP21/ hsFLP, fzP21	with heat shock
	pk/+	w; pkpk-sple13/+; Act>>fzmKate2sfGFP, fzP21/fzP21	with heat shock
	dsh/+	w dsh1 hsFLP/+;; Act>>fz-mKate2sfGFP, fzP21/fzP21	with heat shock
	stbm/+	w; stbm6/+; Act>>fz-mKate2sfGFP, fzP21/hsFLP, fzP21	with heat shock
	fmi/+	w; fmiE59/+; Act>>fz-mKate2sfGFP, fzP21/hsFLP, fzP21	with heat shock
Sup. Fig.4	wt	w1118	with heat shock
	no de novo	w; Act>>fz-eYFP/+; fzP21/fzP21	with heat shock
	de novo	w hsFLP/+; Act>>fz-eYFP/+; fzP21 FRT80/fzP21	with heat shock
	no repol.	w;; hh-Gal4/UAS>>Fz [NL]	with heat shock
	repol.	w hsFLP/+;; hh-Gal4/UAS>>Fz [NL]	with heat shock
Sup. Fig.5	repolarisation	y w hsFLP/+;; UAS>>fz[NL], Act-fz-mKate2sfGFP, fzP21/hh-Gal4, fzP21	with heat shock
	de novo	w;; hsFLP, fzP21/Act>>fz-mKate2sfGFP, fzP21	with heat shock
	control	w;; Act-fz-mKate2sfGFP, fzP21/fzP21
Sup. Fig.6	repolarisation	y w hsFLP/+;; UAS>>fz[NL], Act-fz-mKate2sfGFP, fzP21/hh-Gal4, fzP21	with heat shock
	repolarisation in de novo	y w hsFLP/+;; UAS>>fz[NL], Act>>fz-mKate2sfGFP, fzP21/hh-Gal4, fzP21	with heat shock
